1 **Title page**

2

3 **Fine Tuning of Histone Demethylase KDM6A/B Improves the Development of Nuclear**  
4 **Transfer Embryo**

5

6 Lei Yang<sup>1,2</sup>, Lishuang Song<sup>1,2</sup>, Xuefei Liu<sup>1,2</sup>, Lige Bai<sup>1,2</sup>, and Guangpeng Li<sup>1,2,\*</sup>

7 1 State Key Laboratory of Reproductive Regulation and Breeding of Grassland Livestock,  
8 Inner Mongolia University, Hohhot 010070, China.

9 2 Research Center for Mammalian Reproductive Biology and Biotechnology, College of Life  
10 Sciences, Inner Mongolia University, Hohhot 010070, China.

11 \* Corresponding author. Tel: +86 471 4994329; E-mail: gpengli@imu.edu.cn

12

## 13 **Abstract**

14 Despite the success of the production of animals by somatic cell nuclear transfer (SCNT) in  
15 many species, the method is limited by a low efficiency. After zygotic genome activation  
16 (ZGA), a large number of endogenous retroviruses (ERVs) are expressed, including the  
17 murine endogenous retrovirus-L (MuERV/L/MERV/L). In this study, we generated a series of  
18 MERV/L-reporter mouse strains to detect the ZGA event in embryos. We found that the  
19 majority of SCNT embryos exhibited ZGA failure, and histone H3 lysine 27 trimethylation  
20 (H3K27me3) prevented SCNT reprogramming. Overexpression of the H3K27me3-specific  
21 demethylase KDM6A, but not KDM6B, improved the efficiency of SCNT. Conversely,  
22 knockdown KDM6B not only facilitate ZGA, but also impede ectopic Xist expression in SCNT  
23 reprogramming. Furthermore, the knockdown of KDM6B increased the rate of SCNT-derived  
24 Duchenne muscular dystrophy embryonic stem cell establishment, indicate that these results  
25 not only provide insight into the mechanisms underlying failures of SCNT, but also may  
26 extend the applications of SCNT.

27

28 **Keywords:** H3K27me3 / KDM6A / KDM6B / MERV/L / nuclear reprogramming

29

30

## 31 **Introduction**

32 The metaphase II (MII) oocyte cytoplasm can reprogram somatic cell nuclei to the totipotent  
33 or pluripotent state via a series of sequential epigenetic events, including histone  
34 modifications, X chromosome reactivation, and pluripotency gene reactivation [1-4]. Somatic  
35 cell nuclear transfer (SCNT) has obvious advantages over other similar biotechnology  
36 techniques by enabling the generation of a new individual with an identical genome to that of  
37 the donor cell [5, 6]. However, SCNT-mediated reprogramming has a very low efficiency [7].  
38 In particular, in mice, nearly half of SCNT embryos arrest at the pre-implantation stage and  
39 only 1–2% of SCNT embryos develop to term [8]. The molecular mechanisms underlying  
40 SCNT reprogramming are still unknown. Nevertheless, the successful reprogramming of

41 human somatic cells by SCNT and the derivation of nuclear transfer embryonic stem cells  
42 (ntESCs) suggest that this is a promising approach [9-12].

43

44 A major feature of SCNT reprogramming is the global shift in gene expression from the  
45 somatic to the embryonic state. Zygotic genome activation (ZGA) occurs at the 2-cell stage in  
46 mice and at the 4- to 8-cell stage in pigs, bovines, and humans [13]. When the zygotic  
47 genome is first transcribed, a large number of retrotransposons are expressed, including  
48 endogenous retroviruses (ERVs), long interspersed nuclear elements, and non-autonomous  
49 short interspersed nuclear elements [14, 15]. MERVL repeats belong to type III ERVs and are  
50 specifically expressed at the 2-cell stage [16-21]. Hundreds of genes express chimeric  
51 transcripts with junctions to MERVL at the 5' end, indicating that the long terminal repeats  
52 (LTRs) of MERVL serve as functional promoters [22, 23]. In the present study, we generated  
53 transgenic mouse lines containing a red fluorescent protein tandem dimeric tomato  
54 (tdTomato) reporter under the control of MERVL-LTR (MERVL::tdTomato). We used this  
55 unique reporting system to monitor ZGA in SCNT reconstructed embryos. Recent studies  
56 have indicated that ZGA in SCNT embryos is limited by histone H3 lysine 9 trimethylation  
57 (H3K9me3) barriers that preexist in the genome of donor cells [7, 24]. Previous studies have  
58 also indicated that treatment with pharmacological histone deacetylase and DNA  
59 methyltransferase inhibitors improves SCNT efficiency [25, 26]. However, SCNT efficiency is  
60 still not comparable to normal embryonic development, and it is likely that additional  
61 obstacles to SCNT reprogramming exist.

62

63 In this study, we demonstrated that ZGA failure is frequent in SCNT-generated embryos, and  
64 another prominent silencing marker, H3K27me3, is an obstacle for SCNT reprogramming.  
65 The overexpression of KDM6A, a H3K27me3-specific demethylase, facilitates ZGA-related  
66 gene expression in SCNT embryos. However, KDM6A-overexpressing SCNT embryos did  
67 not exhibit more efficient full-term development. On the contrary, KDM6B knockdown not only  
68 improved the blastocyst formation rate, but also increased the cloned embryo birth rate and  
69 ntES establishment efficiency. For future clinical applications of KDM6B knockdown-assisted

70 SCNT, we derived blastocysts from DMD-deficient (X-chromosome linked muscular  
71 dystrophy, mdx) somatic cells and efficiently generated si6B-mdx-ntES. Thus, we established  
72 a highly efficient reprogramming method to improve SCNT for reproductive and therapeutic  
73 cloning.

74

## 75 **Results**

### 76 **Most SCNT Embryos Exhibited ZGA and Developmental Failure**

77 For the sensitive and convenient detection of ZGA events, we generated transgenic mouse  
78 lines containing a MERVL::tdTomato reporter (Fig 1A; Appendix Fig S1A). The cumulus cells  
79 from MERVL::tdTomato transgenic mice were used as nuclear donors for SCNT. As controls,  
80 intracytoplasmic sperm injection (ICSI) embryos were produced using the littermates of  
81 transgenic mice (Fig 1A; Appendix Fig S1B). As expected, the MERVL::tdTomato reporter  
82 was expressed at the late 2-cell stage (Fig 1B, C; Appendix Fig S1C, D; Movies EV1). We  
83 found that only 12% of SCNT embryos exhibited reactivation somatic MERVL::tdTomato at  
84 the 2-cell stage, while 92% of ICSI embryos exhibited reactivation (Fig 1E). MERVL encodes  
85 a canonical retroviral Gag protein [19]. We next verified the accuracy of the  
86 MERVL::tdTomato reporter by immunofluorescence (IF) and real-time quantitative PCR  
87 (qPCR), and these results are in accordance with the fluorescence images (Fig 1B, F;  
88 Appendix Fig S1E). To further confirm that the MERVL::tdTomato reporter can capture ZGA  
89 events, embryos were divided into tdTomato<sup>+</sup> and tdTomato<sup>-</sup> groups according to  
90 MERVL::tdTomato expression. The qPCR results showed that the expression levels of  
91 ZGA-related genes in tdTomato<sup>+</sup> were significantly higher than those in the tdTomato<sup>-</sup> group  
92 (Fig 1G; Appendix Fig S1F). After *in vitro* culture, for both ICSI or SCNT embryos, most  
93 tdTomato<sup>+</sup> embryos developed to the blastocyst stage (97% and 89%, respectively).  
94 Surprisingly, we found that 18% SCNT-tdTomato<sup>-</sup> embryos developed to the blastocyst stage,  
95 but none of the ICSI-tdTomato<sup>-</sup> embryos reached the blastocyst stage, and most of them  
96 were blocked at the 2-cell stage (Fig 1H, I; Appendix Table S1). Notably, previous studies  
97 have shown that ZGA is essential for mouse embryonic development, as embryos will arrest  
98 at the 2-cell stage if ZGA is blocked [27]. Thus, MERVL::tdTomato could be used to monitor

99 ZGA events in real time. Compared with ICSI embryos, a number of SCNT embryos arrested  
100 at various developmental stages (not limited to the 2-cell stage). Moreover, SCNT embryos  
101 are usually incapable of repressing some somatic genes inherited from donor cells [28, 29].  
102 The expression of donor cell-specific genes in SCNT embryos could also lead to the  
103 development of a few SCNT-tdTomato<sup>-</sup> embryos to blastocysts.

104

### 105 **Effect of ZGA on SCNT Embryonic Development and ntESCs Derivation**

106 Having established a correlation between MERVL::tdTomato and blastocyst formation, we  
107 next evaluated whether SCNT-tdTomato<sup>-</sup> could develop to term. Because the IF assay  
108 requires fixation and/or denaturation, thereby preventing development, we used a live-cell  
109 imaging system to assess the full-term developmental ability of SCNT embryos (Fig 2A, B;  
110 Movies EV2). Based on tdTomato fluorescence, the SCNT blastocysts were grouped into  
111 SCNT-tdTomato<sup>+</sup> and SCNT-tdTomato<sup>-</sup>. We detected fewer nuclei in SCNT-tdTomato<sup>-</sup>  
112 blastocysts than in tdTomato<sup>+</sup> blastocysts (Fig 2C, D). To further evaluate developmental  
113 ability *in vivo*, the SCNT-tdTomato<sup>+</sup> and SCNT-tdTomato<sup>-</sup> blastocysts with normal  
114 morphologies were used for embryo transfer. At embryonic day E6.5, no difference was  
115 observed between the SCNT-tdTomato<sup>+</sup> and SCNT-tdTomato<sup>-</sup> blastocysts in the implantation  
116 rate, as determined by the embryo retrieval rate (Appendix Fig S2A, B). However, 84%  
117 (16/19) of fetuses retrieved from tdTomato<sup>+</sup> blastocysts had the typical morphology, with  
118 distinct embryonic and extraembryonic compartments, while none of the tdTomato<sup>-</sup> fetuses  
119 were normal (0/29; Fig 2F). Furthermore, with respect to the ntESCs derivation efficiency,  
120 SCNT-tdTomato<sup>+</sup> blastocysts had higher rates of attachment and ES establishment than  
121 those of SCNT-tdTomato<sup>-</sup> blastocysts (Fig 2G, H; Appendix Fig S2C, D). Previous studies  
122 have demonstrated that Nanog is expressed in the inner cell mass (ICM) of blastocysts, and  
123 Cdx2 is expressed during formation of the blastocyst trophectoderm (TE), which represents  
124 the first step in embryo differentiation [30]. To gain further insights into blastocyst lineage  
125 segregation, the blastocysts derived from SCNT were subjected to IF staining of Nanog and  
126 Cdx2 (Fig 1E). In the SCNT-tdTomato<sup>+</sup> blastocysts, Nanog and Cdx2 were exclusively

127 localized to the nuclei of the ICM and TE, as previously reported in normal embryos [31]. By  
128 contrast, the Nanog and Cdx2 were localized to the cytoplasm of the ICM and TE in the  
129 SCNT derived tdTomato<sup>-</sup> blastocysts. Thus, the Nanog and Cdx2 in SCNT-tdTomato<sup>-</sup>  
130 embryos are mislocalization in a spatial manner, which may partially explain the  
131 developmental defects of SCNT-tdTomato<sup>-</sup> embryos. We next examined the expression of  
132 somatic genes that have been reported to inhibit SCNT reprogramming [28, 32-35]; Fig 2I;  
133 Appendix Fig S2E). We found significant suppression of the expression of somatic cell genes  
134 at the 2-cell stage in the SCNT-tdTomato<sup>+</sup> group, suggesting that these embryos have a  
135 greater degree of reprogramming than that of SCNT-tdTomato<sup>-</sup> embryos.

136

### 137 **Aberrant Reprogramming of H3K27me3 in the SCNT Embryos at the 2-cell Stage**

138 In the SCNT mouse embryos, abnormalities in gene expression have been observed at the  
139 2-cell stage, which corresponds to ZGA events. Furthermore, the epigenetic reprogramming  
140 of the somatic cell genome has been suggested as a key event in SCNT. We next  
141 determined the difference in epigenetic modifications between the SCNT and ICSI embryos  
142 at the 2-cell stage. Because histone H3K9me3 and H3K27me3 are correlated with gene  
143 silencing, while histone H3K4me3 leads to the initiation of gene transcription. The H3K4me3,  
144 H3K9me3, and H3K27me3 modifications of both ICSI and SCNT embryos were investigated  
145 (Fig 3A, B; Appendix Fig S3A, B, C). The IF assay indicated that H3K4me3 and H3K9me3 did  
146 not markedly differ between ICSI and SCNT-tdTomato<sup>+</sup>/tdTomato<sup>-</sup> 2-cell embryos. In contrast,  
147 we found that H3K27me3 was specifically enriched in SCNT-tdTomato<sup>-</sup> embryos, but  
148 moderate stain in SCNT-tdTomato<sup>+</sup> and ICSI embryos. Contrary to H3K27me3 modification,  
149 the H3K27me2 did not differ between ICSI and SCNT derived embryos (Appendix Fig S3D).  
150 To further consolidate the IF results, we compared the H3K27me3 between different type  
151 embryos by Western-blot (WB). In the first set of experiments, SCNT-tdTomato<sup>+</sup>,  
152 SCNT-tdTomato<sup>-</sup> and ICS-embryos were collected at 2-cell stage, the numbers of the  
153 embryos harvested for WB are 500, respectively. Furthermore, the polar bodies were also  
154 removed to avoid histone contamination. As IF results, in the short-exposure condition,  
155 H3K27me3 modification was effectively detected in the in the SCNT-tdTomato<sup>-</sup> and cumulus  
156 cell (Fig. 3C; Appendix Fig S3E). When the embryos used for the WB were increased to  
157 1,000 and under long-exposure condition, a weak band against theH3K27me3 was detected

158 in the SCNT-tdTomato<sup>+</sup> and ICSI samples (Fig. 3C; Appendix Fig S3E). Therefore, the  
159 H3K27me3 modification in the SCNT-tdTomato<sup>+</sup> and ICSI 2-cell embryos is present at very  
160 low levels, but it can be detected. In addition, irrespective of whether female cumulus cells,  
161 male Sertoli cells, or mouse embryonic fibroblasts (MEFs) were used, the difference in  
162 H3K27me3 staining between the two types of SCNT embryos was also observed (Appendix  
163 Fig S3F). It is well known that fertilization unites two highly specialized haploid genomes with  
164 markedly different chromatin modifications within a single cell to form a diploid zygote. In the  
165 short period of the 1-cell stage, the two haploid genomes undergo dramatic asymmetric  
166 chromatin remodeling to reestablish transcriptional activation of zygotic gene expression [36].  
167 We further investigated whether the difference in H3K27me3 modification also exists at the  
168 1-cell zygote stage. We found that in 1-cell ICSI embryos, H3K27me3 signals were prominent  
169 in the maternal pronuclei, but not in the paternal pronuclei (Fig 3D; Appendix Fig S3G), which  
170 are consistent with previous study [37]. Unlike the asymmetric modifications in ICSI embryos,  
171 we detected strong H3K27me3 signals in all pseudo-pronuclei of SCNT embryos (Fig 3E).  
172 Furthermore, we also found that H3K27me3 levels were much higher in SCNT-tdTomato<sup>-</sup>  
173 embryos than in SCNT-tdTomato<sup>+</sup> or ICSI embryos at the morula stage (Fig 3F). According to  
174 the above results, we speculated that H3K27me3 is a natural key barrier preventing somatic  
175 cell nuclear reprogramming. We further examined the presence of H3K27me3 in bovine  
176 embryos, in which ZGA takes place during the 8-cell stage. As expected, the bovine  
177 intraspecific SCNT embryos also had much higher levels of H3K27me3 in the nuclei  
178 compared to those in the *in vitro* fertilization embryos at the 8-cell stage (Fig 3G, H). These  
179 results indicated that the H3K27me3 epigenetic barrier for SCNT-mediated reprogramming is  
180 shared across taxa.

181

### 182 **Overexpression of KDM6A, but not KDM6B, Improves Preimplantation Development in** 183 **SCNT Embryos**

184 Having established that H3K27me3 is a barrier to somatic cell reprogramming, we next  
185 evaluated whether the removal of H3K27me3 could facilitate ZGA in SCNT embryos. We  
186 compared the expression levels of KDM6A and KDM6B, which are H3K27me3-specific  
187 demethylases, between ICSI embryos and SCNT embryos by RT-qPCR (Fig 4A, B). Neither  
188 KDM6A nor KDM6B was adequately activated in SCNT embryos. In addition, the expression



189 levels of other KDMs in SCNT embryos were also lower than those in ICSI embryo (Appendix  
190 Fig S4A). To correct the H3K27me3 modification, the *in vitro* transcription vectors KDM6A  
191 and KDM6B tagged C-terminally with the hemagglutinin epitope (KDM6A-HA and  
192 KDM6B-HA) were constructed (Fig 4C). The exogenous HA ectopic expression vectors  
193 allowed us to track the KDM6A and KDM6B proteins in early embryos, without the use of  
194 specific antibodies. Strikingly, IF staining showed that ectopic expression of KDM6A or  
195 KDM6B markedly reduced the levels of H3K27me3 (Fig 4D; Appendix Fig S4D). Furthermore,  
196 other lysine methylation marks, including H3K9me3 and H3K4me3, were not affected  
197 (Appendix Fig S4B). Subsequently, we determined whether both KDM6A and KDM6B can  
198 improve the efficiency of SCNT reprogramming. We first injected KDM6A mRNA into  
199 enucleated MII oocytes (Fig 4E), and found that the overexpression of KDM6A mRNA  
200 significantly increased developmental efficiency (as determined by the blastocyst formation  
201 rate; Fig 4F). Surprisingly, the efficiency of SCNT was greatly reduced by injecting KDM6B  
202 mRNA into enucleated MII oocytes prior to SCNT (even at low doses; Fig 4F; Appendix Fig  
203 S4C). We also noticed that a KDM6A concentration of 20 or 50 ng/ $\mu$ l substantially improved  
204 the SCNT blastocyst development rate, while concentrations of KDM6A mRNA over 200  
205 ng/ $\mu$ l were detrimental to embryonic development (Fig 4G; Appendix Fig S4C). To further  
206 investigate whether KDM6A overexpression improved the efficiency of full-term development,  
207 we transferred the SCNT embryos derived above into surrogates. For most transfers,  
208 pregnancies were established and maintained until day E8.5 and the fetuses were retrieved  
209 on that day (Fig 4H left). We found that the embryo retrieval rate for the group injected with  
210 KDM6A mRNA was substantially greater than that of directly transferred SCNT embryos (Fig  
211 4I). Unexpectedly, only implantation sites and degenerated embryos were observed on day  
212 E19.5, suggesting that KDM6A-treated SCNT fetuses failed and were reabsorbed at E8.5–  
213 19.5 (Fig 4H right). These results indicate that the overexpression of KDM6A (but not KDM6B)  
214 improved pre-implantation development, but could not improve the rate of full-term  
215 development in SCNT fetuses.

216



217 Both KDM6A and KDM6B are Jumonji (JmjC) domain containing proteins and catalyze the  
218 removal of trimethylation from histone H3K27 by using a hydroxylation reaction with iron ( $\text{Fe}^{2+}$ )  
219 and  $\alpha$ -ketoglutarate ( $\alpha$ -KG) as cofactors [38, 39]. The jumonji gene was named for a mutation  
220 in mice that causes abnormal cruciform neural grooves (in Japanese, jumonji means  
221 cruciform). As shown in Fig 4J, KDM6B shows high homology and structural relationship to  
222 KDM6A, especially in the JmjC domain, but lacks the tetratricopeptide (TPR) domain, which  
223 are assumed to mediate protein-protein interactions [40, 41]. In order to further compare the  
224 differences between KDM6A and KDM6B in SCNT reprogramming. We synthesized  
225 KDM6A-HA expression vectors with different loci mutation, and injecting different type mRNA  
226 into SCNT embryos (Fig 4J; Appendix Fig S4E). When KDM6A-cM-HA (JmjC domain mutant)  
227 or KDM6A-ncM-HA (TPR and JmjC double mutant) was ectopically expressed in SCNT  
228 embryos, no reduction in H3K27me3 methylation levels was observed (Fig 4D; Appendix Fig  
229 S4D), which demonstrating that the demethylation activity is dependent on JmjC domain.  
230 Furthermore, the blastocyst formation rate of SCNT embryos was greatly reduced when  
231 KDM6A-nM-HA was injected, which was similar to that of KDM6B injected SCNT embryos  
232 (Fig 4F, K; Appendix Table S2). Compared with the control group, the efficiency of SCNT was  
233 no different by injecting KDM6A-cM-HA or KDM6A-cnM-HA into SCNT embryos. These  
234 results suggesting that the TPR and JmjC domain were required for KDM6A rescue the poor  
235 developmental phenotype of SCNT embryos, and indirectly indicate that TPR domain may  
236 mediate protein-protein interactions for moderate KDM6A activity in the SCNT  
237 reprogramming.

238

### 239 **KDM6B Knockdown Increased the Expression of KDM6A and Blastocyst Formation** 240 **Rate**

241 As described above, the ectopic overexpression of KDM6A mRNA at low concentrations  
242 improved the SCNT efficiency. We have previously shown that mouse parthenogenetic  
243 embryos in which KDM6B is knocked down exhibited a moderate increase in KDM6A  
244 expression [42]. We speculated that KDM6B knockdown could facilitate ZGA and improve

245 SCNT efficiency. To verify this hypothesis, we designed and constructed short interfering  
246 RNA (siRNA) specifically targeting KDM6A and KDM6B (Fig 5D; Appendix Fig S5A). A siRNA  
247 without any specificity to KDM6A/B or other genes was constructed as an siRNA-control. As  
248 expected, the qPCR results demonstrated that the decrease in KDM6A or KDM6B  
249 expression was accompanied by an increase in KDM6B or KDM6A expression, respectively  
250 (Fig 5A). Furthermore, a marked decrease H3K27me3 levels were observed when injected  
251 with either KDM6A or KDM6B siRNA (Fig. 5C; Appendix Fig S5C). The WB results also  
252 confirmed this phenomenon at another protein levels (Fig. 5B; Appendix Fig S5B). These  
253 findings suggest that KDM6A and KDM6B are functionally redundant and compensate for  
254 each other in SCNT embryos; that is interference of either KDM6A or KDM6B, the levels of  
255 the other will increase. At the beginning of the knockdown assay, we noticed that the  
256 pluripotency genes Oct4, Sox2, and Nanog are acquire the H3K27me3 mark as they get  
257 repressed during ESCs differentiation [43, 44]. In addition, KDM6B also regulate the Hox  
258 gene expression, which are essential for regulating cell differentiation and the formation of  
259 body structures during early embryonic development. In order to avoid injuries caused by  
260 knockdown KDM6B, we next tested a serial dilution of siRNA-6B to determine the knockdown  
261 efficiency (Fig 5D). Briefly, the optimal injection concentration of siRNA-6B in our experiment  
262 was 10  $\mu$ M. We then injected siRNA-6B into recipient MII oocytes before SCNT (Fig 5E). We  
263 next wondered whether there were differences between KDM6B knockdown and KDM6A  
264 overexpression in the rate of SCNT blastocyst formation. Notably, the injection of KDM6B  
265 siRNA before SCNT increased the blastocyst rate to 70.8%, which did not differ significantly  
266 from the rate observed for KDM6A mRNA injection alone (70.3%; Fig 5F, G; Appendix Table  
267 S3). Furthermore, using Sertoli or MEF cells, the injection of siRNA-6B before SCNT also  
268 increased the blastocyst formation rate (Fig 5G; Appendix Fig S5D and Table S3). When we  
269 performed the same trials for bovine intraspecific SCNT, siRNA-6B injection also improved  
270 the developmental efficiency (Fig 5G; Appendix Fig S5D and Table S3). Interestingly, when  
271 we decrease the expression of KDM6A by injecting siRNA-6A into SCNT embryo, and found  
272 the blastocyst formation rate was significantly reduced (Fig 5F, G; Appendix Table S3). To

273 further examine whether the positive effect of siRNA-6B on SCNT embryonic development is  
274 dependent on the observed increase KDM6A expression. We next double injection of  
275 siRNA-6A-6B into SCNT embryo. We observed significantly lower developmental potential  
276 for siRNA-6A-6B injected SCNT embryos, with the majority arresting at the 2-stage and only  
277 a few reaching the blastocyst stage (Fig 5F, G; Appendix Table S3). We also compared the  
278 ZGA related genes expression between different type siRNA injected SCNT embryos via  
279 RT-qPCR. Similarly, the qPCR results showed that the expression of ZGA related genes are  
280 decreased in SCNT embryo with siRNA-6A or siRNA-6A-6B injected compared with the  
281 control (Fig 5H). These results suggest that the overexpression of KDM6A or knockdown of  
282 KDM6B can improve the efficiency of SCNT reprogramming.

283

#### 284 **KDM6B Knockdown Increased the SCNT Embryo Birth Rate as well as the Efficiency of** 285 **DMD-specific ntES Derivation**

286 Reactivation of pluripotency genes is a major event for the successful reprogramming of  
287 somatic cells to the blastocyst state. In particular, the transcription factor Oct3/4 (Pou5f1) is  
288 expressed in the ICM of the blastocyst stage, which is an effective indicator of embryonic  
289 quality. To determine the extent to which the injection of siRNA-6B could overcome ZGA  
290 defects in the SCNT embryos, we intercrossed MERVL::tdTomato with Oct4::EGFP  
291 transgenic mice (expressing the enhanced green fluorescence protein controlled by the  
292 Oct3/4 promoter) to produce MERVL::tdTomato/Oct4::EGFP dual reporter mice (Fig 6A;  
293 Appendix Fig S6A). Similar to other somatic cells, the cumulus cells and sperm did not  
294 express tdTomato and EGFP (Appendix Fig S6B). As expected, 40.7% of the siRNA-6B  
295 injected SCNT embryos exhibited tdTomato expression at the 2-cell stage, whereas only 3.5%  
296 of the siRNA-control group exhibited tdTomato fluorescence (Fig 6B, C). We also found weak,  
297 but substantial expression of Oct4::EGFP in the siRNA-6B-injected blastocysts (25/33,  
298 75.6%), but not in the siRNA-control injected embryos (0/25; Fig 6D). We further compared  
299 the Oct4::EGFP mRNA levels between ICSI and siRNA-injected SCNT blastocysts. The  
300 qPCR results also showed that Oct4::EGFP mRNA expression was higher in SCNT

301 blastocysts injected with siRNA-6B than in controls (Fig 6E). Moreover, the  
302 siRNA-6B-injected embryos contained a greater total cell number than that of the control  
303 blastocysts (118 in siRNA-6B injected vs. 67 in control; Appendix Fig S6C). We next  
304 investigate whether this positive effect could be contributing to cloned mice birth. For this  
305 purpose, siRNA-6B-injected SCNT embryos were transferred at the 2-cell stage into  
306 pseudo-pregnant females. Caesarian section at E19.5 revealed that the 6.0% (16/265; six  
307 twins) of transferred siRNA-6B-injected SCNT embryos developed to term, while none of the  
308 120 transferred control embryos developed to term (Fig 6F; Appendix Fig S6D, E). To better  
309 characterize post-implantation development, we retrieved the siRNA-6B-injected SCNT  
310 conceptus at E15.5. The results showed that 43.5% (17/39) of the implantation sites still  
311 contained a fetus (nearly half of which were still alive; Appendix Fig S6F). Upon closer  
312 examination, we found one fetus (1/17) with intestinal fistula and skull closure defects  
313 (Appendix Fig S6D).

314

315 Subsequently, we evaluated whether KDM6B knockdown could improve ntES derivation.  
316 Therefore, SCNT blastocysts were derived from MERVL::tdTomato/Oct4::EGFP cumulus  
317 cells and the standard protocol was used to establish ntES. Compared with unmanipulated  
318 SCNT embryos, the efficiency of ntES derivation increased from 39.5% to 80.3% with  
319 siRNA-6B injection, and all ntES lines expressed Oct4::EGFP (Appendix Fig S6G). As SCNT  
320 can be used to consistently reprogram somatic cells to pluripotency, it is ideal for cell  
321 replacement therapies. We next used mouse tail-tip MEFs of DMD-deficient mdx mice as  
322 nuclear donors. SCNT blastocyst attachment to the feeder cell increased from 13% to 57%,  
323 and ntES derivation increased from 4% to 27% by siRNA-6B injection (Fig 6G). The  
324 si6B-mdx-ntES generated from siRNA-6B injected SCNT blastocyst showed characteristic  
325 ES morphology and expressed ES markers such as Oct4, Sox2, Ssea1, and E-Cadherin (Fig  
326 6H). To further investigate the si6B-mdx-ntES differentiation capacity, we performed *in vitro*  
327 differentiation and *in vivo* chimera assays. si6B-mdx-ntES could efficiently give rise to three

328 germ layer cells (Fig 6I). Furthermore, the si6B-mdx-ntES lines efficiently contributed to adult  
329 chimeric mice (Fig 6J).

330

### 331 **SCNT Embryonic Transcriptome Upon KDM6B Knockdown Resembled *In Vivo*** 332 **Fertilized Embryos**

333 Having demonstrated that KDM6B knockdown markedly improved SCNT efficiency, we next  
334 evaluated corresponding changes at the molecular level. We first used a qPCR assay to  
335 detect the 2-cell embryo-specific transcripts (Appendix Fig S7A). We found that *Zscan4*,  
336 *Gm6763*, *Eif1a*, and *MERVL* levels were higher in NT blastocysts with siRNA-6B injection  
337 than in the control. Interestingly, *MERVL* was strongly upregulated, but other repeat elements,  
338 such as *LINE-1* and *IAP* (intracisternal A particles), were unaffected. These results  
339 suggested that the knockdown of KDM6B improved the developmental potential of SCNT  
340 embryos by increasing ZGA-related transcripts. To further verify this result, we used  
341 single-cell RNA sequencing (scRNA-seq) to evaluate the transcriptome in siRNA-6B-injected  
342 SCNT embryos. We also noticed that injection of siRNA-6B does not make every SCNT  
343 embryos active *MERVL::tdTomato* expression and reach the blastocyst. We combined  
344 live-cell imaging, blastomeric biopsy, and scRNA-seq to accurately characterize the  
345 molecular characteristics (Fig 7A; Movies EV3). We first confirmed that the removal of a  
346 single blastomere at the 2-cell stage did not influence the developmental capacity (Appendix  
347 Fig S7B, C; Movies EV4). Using this system, we removed one blastomere from  
348 siRNA-6B-injected *MERVL::tdTomato*-SCNT 2-cell stage embryos for scRNA-seq (referred  
349 to as si6B-NT); the remaining blastomeres were monitored by live-cell imaging system for  
350 blastocyst formation and *tdTomato* expression. We also generated scRNA-seq profiles for  
351 normal SCNT 2-cell embryos (NT-2), and the publicly available fertilized 2-cell embryo  
352 RNA-seq dataset was harvested as WT-2 [45]. Finally, we obtained > 65 million 90-bp reads  
353 per sample, with at least 72.8% of the reads aligning to the mouse genome. Two biological  
354 replicates for each sample demonstrated high reproducibility (Appendix Fig S7D). Compared  
355 to NT-2 embryos, 1,175 genes were highly expressed in siRNA-6B-injected embryos (FC > 5,

356 FPKM > 5; Fig 7B). We next focused on the expression of 7,773 representative ZGA-related  
357 gene [45], because we supposed that knockdown of KDM6B to promote ZGA in SCNT  
358 embryos. A pairwise comparison of the transcriptomes of NT-2, si6B-NT, and WT-2 embryos  
359 identified 1,813 differentially expressed ZGA-related genes (FC > 5, FPKM > 5), and these  
360 DEGs (differentially expressed gene) could be classified into two groups (designated Group1  
361 and Group2) by an unsupervised hierarchical cluster analysis (Fig 7C; Dataset EV1, 2).  
362 Group2 genes were significantly more highly expressed in SCNT embryos injected with  
363 siRNA-6B than in the NT-2 embryo. To further investigate whether these DEGs cause  
364 developmental issues in SCNT embryos, we used GO (Gene ontology) and KEGG (Kyoto  
365 encyclopedia of genes and genomes) to analyze enrichment for biological processes and  
366 pathways. Group2 genes were enriched for cell cycle, methyltransferase activity, ribosome,  
367 and mitochondrion categories. These results suggest that the dysregulation of these  
368 developmentally important genes might be a cause of SCNT failure.

369

370 It is well known that *Zscan4* plays an important role in lengthening telomeres by  
371 recombination-based mechanisms and in maintaining genomic stability during embryonic  
372 development; the depletion of *Zscan4* causes a severe delay in pre-implantation  
373 development [46]. Therefore, we further examined the DEGs between si6B-NT and NT-2 (Fig  
374 7D; Appendix Fig S7E). We found that the knockdown of KDM6B expression increased the  
375 expression of *Zscan4* and *Eif1a-like* genes, suggesting that the knockdown of KDM6B  
376 increases the efficiency of SCNT reprogramming. Furthermore, we also identified 319 genes  
377 that were not activated in 2-cell SCNT embryos and were derepressed by KDM6B  
378 knockdown (FC > 5, FPKM > 5; Fig 7E; Dataset EV3). KEGG and GO analyses indicated  
379 these genes are enriched for methyltransferase activity, metabolic pathways, and RNA  
380 processes (Fig 7E right). Taken together, these results indicate that KDM6B knockdown can  
381 facilitate the activation of the embryonic genome in SCNT reprogramming.

382

383 **Knockdown KDM6B not Only Facilitate ZGA in SCNT, but also Impede Ectopic Xist**  
384 **Expression**

385 The results above showed that 2-cell stage aberrant epigenetic reprogramming can be  
386 rescued through overexpression KDM6A or knock down KDM6B. Although aberrant  
387 SCNT-ZGA is believed to be the main reason for low cloning efficiency. Another error identified  
388 in SCNT embryo is ectopic expression of the Xist (X-inactive specific transcript), which  
389 initiates X chromosome inactivation. Recently, H3K27me3 was identified as an imprinting  
390 mark for Xist [47], which prompted us to ask whether it is also responsible for fine-tuning  
391 KDM6A/B improved development of SCNT embryo. Due to exact adjustment by siRNA is  
392 technically difficult, we next primarily focused on male SCNT embryos with only a single X  
393 chromosome and never expressed at 4-cell stage. According to a previous report [48], sex  
394 screening of early mouse embryos was determined by PCR using a single blastomere biopsy  
395 at the 4-cell stage (Fig 7F). To determine whether loss of H3K27me3 modification can induce  
396 Xist derepression in embryos, we first injected KDM6A and KDM6B mRNA into ICSI derived  
397 embryos. As Inoue A et al. report [47], RNA fluorescent in situ hybridization (FISH) analysis  
398 confirmed that KDM6A/B mRNA injection induce ectopic expression of Xist, and only KDM6A  
399 in a concentration-dependent manner (Appendix Fig S7F). To evaluate the effect of  
400 fine-tuning KDM6A/B on Xist expression in SCNT embryos, we harvested Sertoli cell derived  
401 SCNT embryos for Xist RNA detection via FISH assay. As shown in Fig 7G, the majority of  
402 SCNT derived blastomere showed Xist RNA signal, and ICSI derived embryos showed no  
403 Xist signal. As expected, KDM6B knockdown by siRNA-6B led to Xist down-regulation and  
404 loss of Xist signal within the nucleus of SCNT embryos. In contrast, most of the siRNA-6A  
405 injected SCNT embryos still showed one strong Xist signal in blastomeres. Previous studies  
406 demonstrated that ectopic expression of Xist will lead to large-scale downregulation of X  
407 chromosome-linked genes in the SCNT embryos [3, 49]. The effect of siRNA-6B on ectopic  
408 Xist expression was further examined the expression levels of Xist and X-linked genes (*Tsix*,  
409 *Rnf12*, *Pgk1*, *Fmr1nb*, *Atrx*, *Uba1*, *Mecp2* and *Plac1*) via single embryo RT-qPCR (Fig 7H).  
410 Consistent with the FISH results, the significant down-regulation of Xist observed in SCNT



411 embryos that had been injected with siRNA-6B. In contrast, Xist was significantly  
412 up-regulated in KDM6A mRNA injected SCNT embryos, and the X-linked genes were also  
413 up-regulated in siRNA-6B injected embryos.

414

415 Related studies have demonstrated that the ectopic expression of Xist in SCNT derived  
416 embryos could be corrected by siRNA-Xist, leading to more than a 10-fold increase in the  
417 birth rate of male clones [3, 49, 50]. To examine whether the combination of siRNA-Xist and  
418 siRNA-6B could further improve SCNT embryonic full-term development. We then performed  
419 embryo transfer experiments to assess the full-term developmental ability of siRNA-Xist-6B  
420 coinjected SCNT embryos. Similar to previous report [3], injected with siRNA-Xist alone  
421 improved the birth rate from 1.3% (1/77) to 11.7% (12/103) (Fig 7I; Appendix Table S4).  
422 Importantly, siRNA-Xist-6B coinjected further increased the SCNT birth rate to 21.1% (16/76).  
423 This result indicates that siRNA-6B and siRNA-Xist exert a synergistic effect on the SCNT  
424 reprogramming. Thus, knock down KDM6B not only facilitate the cloned embryos ZGA, but it  
425 can also impede ectopic Xist expression in SCNT reprogramming.

426

## 427 **Discussion**

428 Pre-implantation embryogenesis encompasses several critical events, especially the  
429 activation of ZGA-related genes. In 2014, Matoba and colleagues identified reprogramming  
430 resistant regions (RRRs), which are enriched for the histone modification H3K9me3 [7]. Liu  
431 and colleagues proved that excessive H3K9me3 modifications would lead to ZGA failure [24].  
432 Therefore, ZGA is indispensable for somatic cell reprogramming [26]. It is noteworthy that a  
433 lack of relevant animal models has hampered precise spatiotemporal detection and critical  
434 evaluations of the efficacy of ZGA in SCNT reprogramming. Immunocytochemistry requires  
435 sample fixation and is insufficient for real-time monitoring of ZGA events. To the best of our  
436 knowledge, the present study generated the first MERVL::tdTomato transgenic mice. To  
437 detect the efficiency of SCNT reprogramming, we crossed the MERVL::tdTomato mouse  
438 strain with the Oct4::EGFP transgenic mouse strain (also known as OG2) [51]. The

439 compound homozygous MERVL::tdTomato/Oct4::EGFP double transgenic mice provide the  
440 opportunity for serial real-time monitoring of ZGA and reprogramming efficiency.

441

442 The MERVL::tdTomato/Oct4::EGFP SCNT-embryos can be divided into three groups:  
443 MERVL<sup>-</sup>/Oct4<sup>-</sup>, MERVL<sup>+</sup>/Oct4<sup>-</sup>, and MERVL<sup>+</sup>/Oct4<sup>+</sup>. Only a small proportion of reconstructed  
444 embryos were labeled by both reporters (MERVL<sup>+</sup>/Oct4<sup>+</sup>), and we never found MERVL<sup>-</sup>  
445 /Oct4<sup>+</sup> SCNT embryo. We only detect moderate H3K27me3 modifications in the MERVL<sup>+</sup>  
446 SCNT- and ICSI-embryos at the 2-cell stage, but we clearly detected strong H3K27me3  
447 staining in the MERVL<sup>-</sup> SCNT embryos. Although the H3K27me3 defect in SCNT embryos  
448 has been observed, previous studies have reported the loss of H3K27me3 in ICM cells of  
449 most SCNT embryos [52]. This difference might be explained by a difference in the time of  
450 embryo collection between studies. Our scRNA-seq transcriptome also demonstrated that  
451 ZGA-related genes failed to be properly activated in MERVL<sup>-</sup> SCNT compared with *in vitro*  
452 fertilization embryos. Furthermore, a high H3K27me3 level is detrimental to bovine SCNT  
453 embryonic development, consistent with porcine SCNT reprogramming [53]. Collectively,  
454 these results suggested that SCNT embryos are H3K27me3-defective at the ZGA stage,  
455 which serves as another barrier to mouse, bovine, and porcine SCNT reprogramming.

456

457 In a series of rigorous experiments, we demonstrated that only injection with a low  
458 concentration (20 or 50 ng/μl) of KDM6A mRNA could facilitate the cloned embryos ZGA, and  
459 improve the pre-implantation developmental potential. Although we were able to efficiently  
460 obtain SCNT blastocysts by KDM6A injection, but failed to obtain live cloned pups. In recently,  
461 one study claimed that injection with a higher concentration (1,000 ng/μl) of KDM6A mRNA  
462 can improve the SCNT embryo preimplantation development [54], which were contrary to  
463 present study. Furthermore, Bai et al. only found high efficiency in preimplantation  
464 development of SCNT embryos by reducing H3K27me3, but whether the post-implantation  
465 development of SCNT embryos can also be improved is not test. In addition to abnormal ZGA,  
466 another SCNT reprogramming obstacle is aberrant Xist activation following SCNT [55]. The

467 downregulation of X-linked genes is mainly caused by the ectopic expression the Xist, which  
468 responsible for the X chromosome inactivation (XCI). Deletion of Xist or repression of Xist  
469 expression by siRNA can elevate about 10-fold normal birth rate of mouse cloning [3, 49]. Bai  
470 et al. claimed that H3K27me3 removal corrected SCNT-specific aberrant XCI status in cloned  
471 embryos. This was especially of interest since it was recently reported that H3K27me3 serves  
472 as the imprinting mark of Xist, and loss of H3K27me3 induces Xist ectopic expression [47, 50].  
473 To further determine the role of KDM6A in the XCI of SCNT, we injected KDM6A mRNA  
474 (1,000 ng/ $\mu$ l) into SCNT embryos, and found that the developmental efficiency of SCNT  
475 embryos was reduced, while many X-linked genes were consistently repressed. In contrast,  
476 knockdown of KDM6B could increase the SCNT embryo birth rate as well as the efficiency of  
477 DMD-specific NTES derivation. Thus, knock down KDM6B not only facilitate the cloned  
478 embryos ZGA, but it can also impede ectopic Xist expression in SCNT reprogramming.

479

480 Previous studies have shown that the knockdown of KDM6B or over-expression of KDM6A in  
481 MEFs results in significantly more iPSC colonies compared with wild-type cells [56, 57].  
482 Interestingly, the knockdown of KDM6B in SCNT embryos leads to a moderate increase in  
483 the expression of KDM6A, consistent with our previous findings in mouse parthenogenetic  
484 embryos [42]. While our paper was under preparation, another study reported the  
485 identification of H3K27me3-dependent imprinting genes (which include *Gab1*, *Sfmbt2* and  
486 *Slc38a4*), and previous studies have shown that these genes exhibit a loss of imprinting in  
487 SCNT embryos [58, 59]. This provides an explanation for why the knockdown of the  
488 H3K27me3 demethylase KDM6B promotes SCNT efficiency. In addition to the silencing of  
489 the histone modification, a recent study found that H3K4me3, an activating modification, is  
490 also obstacle to reprogramming [29]. The findings of the present study in combination with  
491 previous results in the field indicate that there are many obstacles in SCNT reprogramming.  
492 Further studies should focus on identifying the core obstacle.

493

494 **Materials and Methods**

495

496 **Ethics statement**

497 All studies adhered to procedures consistent with the National Research Council Guide for  
498 the Care and Use of Laboratory Animals and were approved by the Institutional Animal Care  
499 and Use Committee at Inner Mongolia University.

500

501 **Animals**

502 C57BL/6N, DBA/2 and BDF1 (C57BL/6N × DBA/2) F1 strains of mice were purchased from  
503 Vital River Laboratories (China). Pseudopregnant CD1 or Kun-Ming (KM) white mice were  
504 used as embryo recipients. In order to detect reprogramming by means of Oct4 promoter  
505 driven EGFP, BDF1 mice were replaced with OG2 mice that carry an Oct4-EGFP transgene  
506 (JAX stock number 004654). All the MERLV::tdTomato transgenic mice are syngeneic and  
507 bred by the same positive Founder (F0). All the embryos used in the experiment were  
508 produced by MERVL::tdTomato sperm and MII oocytes from the littermates of transgenic  
509 mice. The copy numbers of MERLV::tdTomato were detected by previously reported methods  
510 [60, 61]. In brief, we detected approximately 200 copies of MERLV::tdTomato in reporter  
511 transgenic mice as determined by quantitative PCR. Furthermore, the MERLV::tdTomato  
512 transgene copy number was stable throughout the F20 generations.

513

514 **Superovulation and *in vivo* fertilization**

515 Chemicals were purchased from Sigma Chemical Co. (USA) unless otherwise indicated.  
516 Superovulation was done as previously described [42]. Briefly, BDF1 female (6 ~ 8 weeks old)  
517 mice were superovulated by intraperitoneal injection of pregnant mare serum gonadotropin  
518 (PMSG; Sansheng, China, 10 IU) and human chorionic gonadotropin (hCG; Sansheng,  
519 China, 10 IU) 48 h apart. Mice were sacrificed by cervical dislocation and cumulus-oocyte  
520 complexes (COCs) were collected from oviducts 14 h post hCG. For zygotes, superovulation  
521 of 7- to 8-week-old BDF1 females mated with males of the same strain. Successful mating  
522 was confirmed by the presence of vaginal plugs. The cumulus cells were dispersed by 0.3  
523 mg/mL hyaluronidase in M2 medium (Millipore, USA).

524

525 ***In vitro* mRNA synthesis, siRNA construction and microinjection in oocytes**

526 The coding region of KKDM6A and KDM6B was amplified from mouse tail tip genome.  
527 Forward and reverse primers contained T7 promoter and HA sequences, respectively. To  
528 prepare mRNAs for microinjection, pT7-Cas9 (OriGene, GE100014), KKDM6A and KDM6B

529 expression vectors were linearized and subjected to phenol-chloroform extraction and  
530 ethanol precipitation. The mRNA synthesized with the mMESSAGING-mMACHINE T7 Ultra Kit  
531 (Thermo, USA) according to the manufacturer's instructions. Two different siRNA species  
532 targeting KDM6B were designed and synthesized using the silencer siRNA construction kit  
533 (Ambion, USA) following the manufacturer's instructions. A commercially available siRNA  
534 without any specificity to known genes was used as control. As previously described [42],  
535 with minor modifications, 8 pL of siRNA-6B or siRNA-control was microinjected into the  
536 cytoplasm of denuded MII oocytes. Oocytes were injected using Piezo-operated blunt-end  
537 micropipette (3 ~ 5  $\mu$ m internal diameter). After injection, oocytes were kept at RT for 30 min  
538 and then moved into the incubator.

539

#### 540 **Transgenic mice generation**

541 The MERVL::tdTomato vector was a gift from Samuel Pfaff (Addgene 40281). The vector was  
542 linearized with the enzyme. The pronuclear microinjection for the production of transgenic  
543 mice followed previously published studies [62]. Briefly, the linearized vector was injected into  
544 the well-recognized pronuclei, in M2 medium. Injected zygotes were transferred into  
545 pseudopregnant female mice (~30 zygotes per mouse) after 4 h recovery culture in  
546 KSOM-AA medium. For founder identification, Tail tips were subjected to standard  
547 DNA-extraction procedures. For identification MERVL::tdTomato of founders, the extracted  
548 DNA was amplified with MERVL::tdTomato primers flanking the target sites (Appendix Table  
549 S5). Primers were synthesized by Takara Biotechnology Dalian Co. Ltd (Dalian, China). The  
550 amplified DNA fragments were subjected to TA cloning and sequencing. The founder mice  
551 were crossed to the littermates of founder mice for four generations to produce homozygous  
552 MERVL::tdTomato mice. We intercrossed MERVL::tdTomato mice with homozygous  
553 Oct4::EGFP transgenic mice (OG2) for six generations to produce  
554 MERVL::tdTomato/Oct4::EGFP dual reporter mice.

555

#### 556 **SCNT, ICSI, and IVF**

557 The mouse-SCNT, was done as previously described [63]. Briefly, MII oocytes after a brief  
558 culture in KSOM-AA medium, groups of ~50 oocytes were transferred to a chamber  
559 containing oil-covered M2 supplemented with 5  $\mu$ g/mL cytochalasin B (CB). The spindle  
560 chromosome complex (SCC) was removed by a blunt Piezo-driven pipette (PrimeTech,  
561 Japan) on a 37 °C heating stage of an inverted microscope (Nikon, Japan). The nuclei of

562 donor cumulus cells, Sertoli cells, or C57-MEF cells, a small cell (< 10  $\mu\text{m}$ ) was drawn in and  
563 out of the injection pipette until its plasma membrane was broken and was then injected into  
564 enucleated oocytes. For the mdx-MEF cells, live cells with a diameter of 10~15  $\mu\text{m}$  were  
565 selected. The reconstructed embryos were cultured in M199 medium (Thermo, USA)  
566 containing 10% fetal calf serum (FCS; Hyclone, USA) for 1~3 h before activation treatment.  
567 The reconstructed embryos were activated in  $\text{Ca}^{2+}$  free KSOM medium containing 10 mM  
568 strontium and 5  $\mu\text{g}/\text{mL}$  CB for 6 h. Activated constructs were thoroughly washed and cultured  
569 in G1 and G2 medium (Vitrolife, Sweden). The bovine-SCNT, bovine oocytes obtained by  
570 aspirating follicles on slaughterhouse-derived ovaries. We cultured immature cumulus-oocyte  
571 complexes in M199 medium supplemented with 10% FCS, 0.2 mM pyruvate, 200  $\mu\text{g}/\text{mL}$   
572 gentamicin, 0.5 mg/mL luteinizing hormone and 1 mg/mL estradiol for 16 to 18 h at 38.5  $^{\circ}\text{C}$   
573 with 5%  $\text{CO}_2$  in the air. After 18 h the start of maturation, cumulus cells were removed from  
574 the oocytes, and oocytes with extruded first polar bodies were selected as MII oocyte.  
575 Oocytes enucleated using a beveled glass pipette by aspirating the first polar body and the  
576 MII plate in a small amount of surrounding cytoplasm in M199-HEPES medium containing 5  
577  $\mu\text{g}/\text{mL}$  CB. In some experiments, we labeled oocytes with DNA fluorochrome (Hoechst 33342)  
578 before enucleation; to ensure removal of the oocyte chromatin, we exposed the aspirated  
579 cytoplasm to UV light to examine the enucleation. The donor cells were injected into the  
580 perivitelline space of each enucleated oocytes by using the same slit in the zona pellucida as  
581 made during enucleation. Then, we fused nuclear transfer couplets in sorbitol fusion medium  
582 by applying a single electric pulse (1.2 kV/cm for 30  $\mu\text{s}$ ). One hour after fusion, the fused  
583 embryos using 5  $\mu\text{M}$  ionomycin for 5 min, followed by five hours of treatment with 10  $\mu\text{g}/\text{mL}$   
584 cycloheximide (CHX). The reconstructed embryos were cultured and allowed to develop *in*  
585 *vitro* up to the 8-cell or blastocyst stage. The mouse-ICSI, MII oocytes were collected 18 h post  
586 hCG. The sperm were collected from epididymis of 9-week-old BDF1 mice and washed in M2  
587 medium, then suspended in M2 medium supplemented with 10% polyvinylpyrrolidone (PVP).  
588 The MII oocytes were placed in a drop of M2 medium and one sperm head was injected into  
589 a MII oocyte by piezo-micromanipulator. The surviving embryos were collected and cultured  
590 in G1 and G2 medium. The ICSI was done as previously described [64]. Only the sperm head  
591 was injected into the oocyte. After 30 min of recovery, the ICSI-generated embryos were  
592 washed several times and cultured in KSOM-AA medium at 37  $^{\circ}\text{C}$  in a 5%  $\text{CO}_2$  in air  
593 atmosphere. The mouse-IVF, sperm was obtained from the cauda epididymis of male mouse  
594 and incubated at 37  $^{\circ}\text{C}$  for 1 h in HTF supplemented with 5% FBS before the addition of the



595 COCs. The presence of pronuclei was scored 6 h after the initiation of the IVF reaction. After  
596 gamete coincubation, the zygotes were collected and cultured in G1 and G2 medium. The  
597 bovine-IVF, COCs matured for 24 h were co-incubated with sperm ( $10^6$  spermatozoa/mL;  
598 thawing semen in 37 °C water) in IVF medium at 38 °C in 5% CO<sub>2</sub> in air for 20 hours. The IVF  
599 medium consisted of NaCl (114 mM), KCl (3.15 mM), NaH<sub>2</sub>PO<sub>4</sub> (0.39 mM), Na-Lactate (13.3  
600 mM), CaCl<sub>2</sub> (2 mM), MgCl<sub>2</sub> (0.5 mM), Na-Pyrovate (0.2 mM), Penicillin (50 IU/mL),  
601 Streptomycin (50 µg/mL), NaHCO<sub>3</sub> (25 mM), Heparin (10 µg/mL), Penicillamine (20 µM),  
602 Hypotaurine (10 µM), Epinephrine (1 µM), bovine serum albumin (BSA; 6 mg/mL).  
603 Presumptive zygotes were vortexed for 2 min to separate cumulus cells. Groups of ~40  
604 presumptive zygotes were cultured in 500 µL drops of SOF medium under mineral oil at  
605 38.5 °C, 5% CO<sub>2</sub> in humidified air. 72 h after insemination, 5% FCS was added to the culture  
606 media.

607

#### 608 **ntESCs derivation, chimeric mice and embryo transfer**

609 Blastocysts were denuded by Acidic Tyrode's solution and plated on mitomycin treated MEF  
610 feeder layers in a 96-well plate. The ntES cells derivation medium contains Knockout-DMEM  
611 (Thermo, USA) supplemented with 15% (v/v) knockout-serum-replacement (KSR; Thermo,  
612 USA), 1mM GlutaMAX (Thermo, USA), 0.1 mM mercaptoethanol, 1% nonessential amino  
613 acid (Thermo, USA), penicillin/streptomycin (100x; Thermo, USA), nucleosides (100x;  
614 Thermo, USA) and 1,000 U/mL LIF (Thermo, USA). The ntESC colonies formed with  
615 culturing for 10 days, and were picked and transferred for cell passage. The expansion of ES  
616 cells was performed by routine culture. For chimeric experiments, ntESCs were used one day  
617 before passaging, which showed an optimal undifferentiated morphology. The ntESCs were  
618 microinjected into CD1/KM blastocysts using a piezo-microinjection pipette. After culturing for  
619 3 h, the embryos were transplanted into the uterus of pseudo-pregnant mice (~20 mbryos per  
620 mouse). The 2-cell stage SCNT, siRNA-6B, or KDM6A/B injected embryos were transferred  
621 to the oviducts of E0.5 pseudo-pregnant (~20 mbryos per mouse). The embryos were  
622 recovered by caesarian section on the E8.5, E14.5, or E19.5. The cloned pups nursed by  
623 lactating CD1/KM females. SSLP analysis was performed for D6Mit15, D2Mit102, D11Mit236,  
624 D4Mit204 and EGFP. The primer information is presented in Appendix Table S5.

625

#### 626 **Immunofluorescence staining and quantification analysis**

627 Embryos and ntESCs were rinsed three times in phosphate buffered saline (PBS) with 0.3%



628 BSA, fixed with 4% paraformaldehyde (PFA) overnight at 4 °C and then permeabilized with  
629 0.2% (*vol./vol.*) Triton X-100 for 15 min at room temperature, followed by by washing  
630 thoroughly in PBS containing 0.3% BSA. Fixed samples were blocked in 0.05% Twesen-20 in  
631 PBS containing 3% BSA (PBST) at 37 °C for 1 h and then incubated with the primary  
632 antibodies overnight at 4 °C. After blocking and simultaneous incubating with primary  
633 antibodies: anti-H3K27me3 (Millipore, ABE44, USA), anti-H3K27me2 (Abcam, ab24684,  
634 USA), anti-H3K4me3 (Abcam, ab213224, USA), anti-H3K9me3 (Abcam, ab176916, USA),  
635 anti-HA (Santa Cruz, sc-7392, USA), anti-MuERVL-Gag (Epigentek, A-2801-100, USA),  
636 anti-Oct4 (Santa Cruz, sc-8629, USA), anti-Sox2 (Santa Cruz, sc-17319, USA), anti-Cdx2  
637 (Abcam, ab76541, USA), anti-Nanog (Abcam, ab107156, USA), anti-Ssea1 (Santa Cruz,  
638 sc-21702,USA), anti-E-cadherin (Abcam, ab40772,USA), anti-Nestin (Santa Cruz, sc-21247,  
639 USA), anti-Brachyury (Santa Cruz, sc-17745, USA), anti-Gata4 (Santa Cruz, sc-1237, USA).  
640 After incubating, the samples were needed to wash several times in PBST and then  
641 incubated with appropriate secondary antibodies conjugated with Alexa Fluor 594 and Alexa  
642 Fluor 488 (Thermo, USA) for 1 h at 37 °C. For imaging the embryos were mounted in 10 µl  
643 anti-fade solution with DAPI (Thermo, USA) and compressed with a coverslip. After mounted  
644 on glass slides and examined with a confocal laser-scanning microscope (Nikon, Japan). For  
645 fluorescence quantification, the signal intensity was analyzed as described previously [65-67]  
646 (PMID: 18784248, 20422712, 25925669). Briefly, nuclei of blastomeres were identified by  
647 DAPI staining. Quantification analysis of fluorescence intensity in nuclei or cytoplasmic areas  
648 was performed using ImageJ software (NIH, Bethesda, MD, USA; <http://rsbweb.nih.gov/ij/>). In  
649 addition, at least three different cytoplasmic areas were delineated for normalization to  
650 background. The average pixel intensity of the nuclear areas was calculated by ImageJ, and  
651 then normalized by dividing by the average pixel intensity of the background areas.

652

### 653 **RNA-FISH**

654 RNA-FISH on preimplantation embryos was performed as previously described [47, 68].  
655 Briefly, the embryos were fixed in 2% PFA in PBS containing 0.5% Triton X-100 for 20 min at  
656 room temperature. After three washes with 0.1% PVP/PBS, embryos were treated with 0.1 N  
657 HCl containing 0.02% Triton X-100 for 15 min at 4 °C. After three washes with 0.1% PVP/2×  
658 SSC, embryos were incubated in a series of 10%, 20%, and 50% formamide/2× SSC. The  
659 samples were covered with mineral oil, heated for 30 min at 80 °C, and then incubated for  
660 ~30 min at 37 °C. Next, the fixed embryos were performed using ViewRNA ISH Cell Assay Kit

661 (Thermo, USA) based on the manufacturer's instructions. Custom-designed ViewRNA Cell  
662 Plus Probe against Xist (Thermo, VX-06, USA). The embryos were then counterstained with  
663 DAPI, and fluorescence was detected under a laser-scanning confocal microscope (A1+,  
664 Nikon, Japan). Gender identification was performed by PCR according to the methods  
665 described above.

666

### 667 **RNA extraction and RT-qPCR**

668 As previously described [42], total RNA was extracted using the Pico-Pure RNA Isolation Kit  
669 (Thermo, USA) according to the manufacturer's instructions. Total RNA was extracted from  
670 each pool of embryos ( $n = 3$  pools of 20 oocytes or embryos per time point), and residual  
671 genomic DNA was removed by DNase I digestion, using an RNase-Free DNase kit (Qiagen,  
672 Germany). Reverse transcription was performed using SuperScript III (Thermo, USA)  
673 following the manufacturer's instructions. Quantitative RT-PCR was performed using a  
674 SYBR-Taq Master Mix (Applied-BioSystems, USA) and signals were detected with ABI7500  
675 real-time PCR System (Applied-BioSystems, USA). Analysis of relative gene expression was  
676 measured using the  $2^{(-\Delta\Delta Ct)}$  method. For the single embryo RT-qPCR, was done  
677 as previously described [69]. Briefly, embryonic total RNA was extracted using an RNeasy  
678 Micro Kit (Qiagen, Germany) and treated with DNase following the manufacturer's  
679 instructions. mRNAs were reverse by SuperScriptIII Reverse Transcriptase kit (Thermo,  
680 USA). For quantitative gene expression analysis with high specificity, TaqMan probes  
681 (Thermo, USA) were used in single embryo RT-qPCR assays, and the expression levels of  
682 all embryos were normalized to the average expression levels of ICSI group. All the TaqMan  
683 probes and primer sets used in this study are shown in Appendix Table S5.

684

### 685 **Embryo biopsy, library construction and single-cell RNA-seq**

686 The 2-/4-cell embryos were transferred into  $Ca^{2+}$  and  $Mg^{2+}$  free KSOM-AA medium for 1 h to  
687 disrupt cell adhesion, and were then transferred to  $Ca^{2+}$  and  $Mg^{2+}$  free M2 medium on the  
688 micromanipulation dish. The zona pellucida was penetrated by a blunt Piezo-driven  
689 micropipette ( $\sim 30 \mu m$  inner diameter) and one blastomere was gently aspirated from each  
690 manipulated embryo, the rest blastomere were cultured in G1+G2 (1:1) medium with 5%  $CO_2$   
691 at 37 °C. Control (nonbiopsied) embryos were from the same SCNT cohorts and were  
692 cultured under the same conditions as their biopsied counterparts but were not  
693 micromanipulated. The isolated single blastomere was washed twice in PBS-BSA (0.1%) and

694 hold individual blastomeres before placing in lysis buffer and stored in liquid nitrogen. The  
695 single-cell RNA-seq method followed previously published studies [24], only capture mRNAs  
696 with a poly(A) tail. Library construction was performed following the Illumina manufacturer's  
697 instructions and sequencing was performed at the BGI (China). Paired-end sequencing was  
698 further performed on the Illumina Hiseq2000 platform. The sequencing reads that low quality  
699 and adapters were pre-filtered before mapping. Filtered reads were mapped to the mm9  
700 genome using Tophat (v1.3.3) with default parameters, and evaluated using RseQC (v2.3.4).  
701 Transcriptional profiling was done as described [24]. Briefly, data normalization was  
702 performed by transforming uniquely mapped transcript reads. Genes with low expression in  
703 all stages were filtered out, and quantified to FPKM (fragments per kilobase of exon model  
704 per million mapped reads) using Cufflinks (v1.2.0) to eliminate the effects of sequencing  
705 depth and transcript length. Some analyses were performed using R software.

706

#### 707 **Live-cell Imaging procedures**

708 Live-cell Imaging was done as previously described [42, 70]. Briefly, the embryos were  
709 transferred to drops of KSOM-AA medium, and placed in the incubator (Tokai Hit, Japan) on  
710 the microscope stage (A1+, Nikon, Japan) and incubated at 37 °C under 5% CO<sub>2</sub> in air,  
711 Images were acquired by an electron multiplying charge-coupled device (EM-CCD) camera  
712 (iXon 897, Andor Technology, UK). Images were taken over 96 h at 10 or 15 min intervals.  
713 Live-cell Imaging system was housed in a dark room at 27 °C.

714

#### 715 **Data availability**

716 Sequencing data have been deposited in the NCBI sequence read archive (SRA) under  
717 accession code SRR6024636. All other data are available from the authors upon reasonable  
718 request.

719

#### 720 **Acknowledgements**

721 We thank our laboratory colleagues for their assistance with the experiments; Shaorong Gao  
722 (Tongji University), Zhiming Han (Chinese Academy of Sciences), and Qing Xia (Peking  
723 University) for technical assistance. We also thank Yuan Li (New York University) for critical  
724 reading and editing of this manuscript; Yi Zhang (Harvard Medical School) for sharing the list  
725 of RRRs. This study was supported by the National Transgenic Animal Program

726 (2016ZX08007-002) and Basic Research Project in the Inner Mongolia Autonomous Region  
727 (201503001).

728

### 729 **Author contributions**

730 L.Y. and G.L. conceived and designed the study. L.Y., L.S., and X.L. performed the  
731 experiments; L.Y., L.S., X.L., L.B., and G.L. analyzed the data. L.Y. and G.L. supervised the  
732 project. L.Y. and G.L. wrote the manuscript.

733

### 734 **Conflict of interest**

735 The authors declare that they have no conflict of interest.

736

### 737 **References**

- 738 1. Gurdon JB (1962) The developmental capacity of nuclei taken from intestinal epithelium  
739 cells of feeding tadpoles. *J Embryol Exp Morphol* **10**: 622-40
- 740 2. Wakayama T, Tabar V, Rodriguez I, Perry AC, Studer L, Mombaerts P (2001)  
741 Differentiation of embryonic stem cell lines generated from adult somatic cells by nuclear  
742 transfer. *Science* **292**: 740-3
- 743 3. Matoba S, Inoue K, Kohda T, Sugimoto M, Mizutani E, Ogonuki N, Nakamura T, Abe K,  
744 Nakano T, Ishino F, *et al.* (2011) RNAi-mediated knockdown of Xist can rescue the  
745 impaired postimplantation development of cloned mouse embryos. *Proc Natl Acad Sci U*  
746 *S A* **108**: 20621-6
- 747 4. Wilmut I, Schnieke AE, McWhir J, Kind AJ, Campbell KH (1997) Viable offspring derived  
748 from fetal and adult mammalian cells. *Nature* **385**: 810-3
- 749 5. Takahashi K, Yamanaka S (2006) Induction of pluripotent stem cells from mouse  
750 embryonic and adult fibroblast cultures by defined factors. *Cell* **126**: 663-76
- 751 6. Hochedlinger K, Jaenisch R (2003) Nuclear transplantation, embryonic stem cells, and  
752 the potential for cell therapy. *N Engl J Med* **349**: 275-86

- 753 7. Matoba S, Liu Y, Lu F, Iwabuchi KA, Shen L, Inoue A, Zhang Y (2014) Embryonic  
754 development following somatic cell nuclear transfer impeded by persisting histone  
755 methylation. *Cell* **159**: 884-95
- 756 8. Ogura A, Inoue K, Wakayama T (2013) Recent advancements in cloning by somatic cell  
757 nuclear transfer. *Philos Trans R Soc Lond B Biol Sci* **368**: 20110329
- 758 9. Chung YG, Matoba S, Liu Y, Eum JH, Lu F, Jiang W, Lee JE, Sepilian V, Cha KY, Lee  
759 DR, *et al.* (2015) Histone Demethylase Expression Enhances Human Somatic Cell  
760 Nuclear Transfer Efficiency and Promotes Derivation of Pluripotent Stem Cells. *Cell*  
761 *Stem Cell* **17**: 758-66
- 762 10. Chung YG, Eum JH, Lee JE, Shim SH, Sepilian V, Hong SW, Lee Y, Treff NR, Choi YH,  
763 Kimbrel EA, *et al.* (2014) Human somatic cell nuclear transfer using adult cells. *Cell*  
764 *Stem Cell* **14**: 777-80
- 765 11. Yamada M, Johannesson B, Sagi I, Burnett LC, Kort DH, Prosser RW, Paull D, Nestor  
766 MW, Freeby M, Greenberg E, *et al.* (2014) Human oocytes reprogram adult somatic  
767 nuclei of a type 1 diabetic to diploid pluripotent stem cells. *Nature* **510**: 533-6
- 768 12. Tachibana M, Amato P, Sparman M, Gutierrez NM, Tippner-Hedges R, Ma H, Kang E,  
769 Fulati A, Lee HS, Sritanaudomchai H, *et al.* (2013) Human embryonic stem cells derived  
770 by somatic cell nuclear transfer. *Cell* **153**: 1228-38
- 771 13. Li L, Zheng P, Dean J (2010) Maternal control of early mouse development.  
772 *Development* **137**: 859-70
- 773 14. Schoorlemmer J, Perez-Palacios R, Climent M, Guallar D, Muniesa P (2014) Regulation  
774 of Mouse Retroelement MuERV-L/MERVL Expression by REX1 and Epigenetic Control  
775 of Stem Cell Potency. *Front Oncol* **4**: 14
- 776 15. Ishiuchi T, Enriquez-Gasca R, Mizutani E, Boskovic A, Ziegler-Birling C,  
777 Rodriguez-Terrones D, Wakayama T, Vaquerizas JM, Torres-Padilla ME (2015) Early  
778 embryonic-like cells are induced by downregulating replication-dependent chromatin  
779 assembly. *Nat Struct Mol Biol* **22**: 662-71
- 780 16. Eckersley-Maslin MA, Svensson V, Krueger C, Stubbs TM, Giehr P, Krueger F, Miragaia  
781 RJ, Kyriakopoulos C, Berrens RV, Milagre I, *et al.* (2016) MERVL/Zscan4 Network  
782 Activation Results in Transient Genome-wide DNA Demethylation of mESCs. *Cell Rep*  
783 **17**: 179-92

- 784 17. Huang Y, Kim JK, Do DV, Lee C, Penfold CA, Zylicz JJ, Marioni JC, Hackett JA, Surani  
785 MA (2017) Stella modulates transcriptional and endogenous retrovirus programs during  
786 maternal-to-zygotic transition. *Elife* **6**: e22345
- 787 18. Iturbide A, Torres-Padilla ME (2017) Starting embryonic transcription for the first time.  
788 *Nat Genet* **49**: 820-821
- 789 19. Ribet D, Louvet-Vallee S, Harper F, de Parseval N, Dewannieux M, Heidmann O,  
790 Pierron G, Maro B, Heidmann T (2008) Murine endogenous retrovirus MuERV-L is the  
791 progenitor of the "orphan" epsilon viruslike particles of the early mouse embryo. *J Virol*  
792 **82**: 1622-5
- 793 20. Svoboda P, Stein P, Anger M, Bernstein E, Hannon GJ, Schultz RM (2004) RNAi and  
794 expression of retrotransposons MuERV-L and IAP in preimplantation mouse embryos.  
795 *Dev Biol* **269**: 276-85
- 796 21. Whiddon JL, Langford AT, Wong CJ, Zhong JW, Tapscott SJ (2017) Conservation and  
797 innovation in the DUX4-family gene network. *Nat Genet* **49**: 935-940
- 798 22. Peaston AE, Evsikov AV, Graber JH, de Vries WN, Holbrook AE, Solter D, Knowles BB  
799 (2004) Retrotransposons regulate host genes in mouse oocytes and preimplantation  
800 embryos. *Dev Cell* **7**: 597-606
- 801 23. Hayashi M, Maehara K, Harada A, Semba Y, Kudo K, Takahashi H, Oki S, Meno C,  
802 Ichianagi K, Akashi K, *et al.* (2016) Chd5 Regulates MuERV-L/MERVL Expression in  
803 Mouse Embryonic Stem Cells Via H3K27me3 Modification and Histone H3.1/H3.2. *J Cell*  
804 *Biochem* **117**: 780-92
- 805 24. Liu W, Liu X, Wang C, Gao Y, Gao R, Kou X, Zhao Y, Li J, Wu Y, Xiu W, *et al.* (2016)  
806 Identification of key factors conquering developmental arrest of somatic cell cloned  
807 embryos by combining embryo biopsy and single-cell sequencing. *Cell Discov* **2**: 16010
- 808 25. Lu F, Zhang Y (2015) Cell totipotency: molecular features, induction, and maintenance.  
809 *Natl Sci Rev* **2**: 217-225
- 810 26. Inoue K, Oikawa M, Kamimura S, Ogonuki N, Nakamura T, Nakano T, Abe K, Ogura A  
811 (2015) Trichostatin A specifically improves the aberrant expression of transcription factor  
812 genes in embryos produced by somatic cell nuclear transfer. *Sci Rep* **5**: 10127
- 813 27. Warner CM, Versteegh LR (1974) In vivo and in vitro effect of alpha-amanitin on  
814 preimplantation mouse embryo RNA polymerase. *Nature* **248**: 678-80
- 815 28. Teperek M, Miyamoto K (2013) Nuclear reprogramming of sperm and somatic nuclei in  
816 eggs and oocytes. *Reprod Med Biol* **12**: 133-149



- 817 29. Hormanseder E, Simeone A, Allen GE, Bradshaw CR, Figmuller M, Gurdon J, Jullien J  
818 (2017) H3K4 Methylation-Dependent Memory of Somatic Cell Identity Inhibits  
819 Reprogramming and Development of Nuclear Transfer Embryos. *Cell Stem Cell* **21**:  
820 135-143 e6
- 821 30. Dietrich JE, Panavaite L, Gunther S, Wennekamp S, Groner AC, Pigge A, Salvenmoser  
822 S, Trono D, Hufnagel L, Hiiragi T (2015) Venus trap in the mouse embryo reveals distinct  
823 molecular dynamics underlying specification of first embryonic lineages. *EMBO Rep* **16**:  
824 1005-21
- 825 31. Zernicka-Goetz M, Morris SA, Bruce AW (2009) Making a firm decision: multifaceted  
826 regulation of cell fate in the early mouse embryo. *Nat Rev Genet* **10**: 467-77
- 827 32. Yang CS, Lopez CG, Rana TM (2011) Discovery of nonsteroidal anti-inflammatory drug  
828 and anticancer drug enhancing reprogramming and induced pluripotent stem cell  
829 generation. *Stem Cells* **29**: 1528-36
- 830 33. Wang L, Teng F, Yuan X, Liu C, Wang J, Li Y, Cui T, Li T, Liu Z, Zhou Q (2017)  
831 Overexpression of Stella improves the efficiency of nuclear transfer reprogramming. *J*  
832 *Genet Genomics* **44**: 363-366
- 833 34. Gao S, Chung YG, Williams JW, Riley J, Moley K, Latham KE (2003) Somatic cell-like  
834 features of cloned mouse embryos prepared with cultured myoblast nuclei. *Biol Reprod*  
835 **69**: 48-56
- 836 35. Ng RK, Gurdon JB (2008) Epigenetic memory of an active gene state depends on  
837 histone H3.3 incorporation into chromatin in the absence of transcription. *Nat Cell Biol* **10**:  
838 102-9
- 839 36. Wang F, Kou Z, Zhang Y, Gao S (2007) Dynamic reprogramming of histone acetylation  
840 and methylation in the first cell cycle of cloned mouse embryos. *Biol Reprod* **77**: 1007-16
- 841 37. Santos F, Peters AH, Otte AP, Reik W, Dean W (2005) Dynamic chromatin modifications  
842 characterise the first cell cycle in mouse embryos. *Dev Biol* **280**: 225-36
- 843 38. Dimitrova E, Turberfield AH, Klose RJ (2015) Histone demethylases in chromatin biology  
844 and beyond. *EMBO Rep* **16**: 1620-39
- 845 39. Mosammaparast N, Shi Y (2010) Reversal of histone methylation: biochemical and  
846 molecular mechanisms of histone demethylases. *Annu Rev Biochem* **79**: 155-79
- 847 40. Blatch GL, Lassle M (1999) The tetratricopeptide repeat: a structural motif mediating  
848 protein-protein interactions. *Bioessays* **21**: 932-9



- 849 41. Allan RK, Ratajczak T (2011) Versatile TPR domains accommodate different modes of  
850 target protein recognition and function. *Cell Stress Chaperones* **16**: 353-67
- 851 42. Yang L, Song LS, Liu XF, Xia Q, Bai LG, Gao L, Gao GQ, Wang Y, Wei ZY, Bai CL, *et al.*  
852 (2016) The Maternal Effect Genes UTX and JMJD3 Play Contrasting Roles in Mus  
853 musculus Preimplantation Embryo Development. *Sci Rep* **6**: 26711
- 854 43. Pan G, Tian S, Nie J, Yang C, Ruotti V, Wei H, Jonsdottir GA, Stewart R, Thomson JA  
855 (2007) Whole-genome analysis of histone H3 lysine 4 and lysine 27 methylation in  
856 human embryonic stem cells. *Cell Stem Cell* **1**: 299-312
- 857 44. Agger K, Cloos PA, Christensen J, Pasini D, Rose S, Rappsilber J, Issaeva I, Canaani E,  
858 Salcini AE, Helin K (2007) UTX and JMJD3 are histone H3K27 demethylases involved in  
859 HOX gene regulation and development. *Nature* **449**: 731-4
- 860 45. Macfarlan TS, Gifford WD, Driscoll S, Lettieri K, Rowe HM, Bonanomi D, Firth A, Singer  
861 O, Trono D, Pfaff SL (2012) Embryonic stem cell potency fluctuates with endogenous  
862 retrovirus activity. *Nature* **487**: 57-63
- 863 46. Zalzman M, Falco G, Sharova LV, Nishiyama A, Thomas M, Lee SL, Stagg CA, Hoang  
864 HG, Yang HT, Indig FE, *et al.* (2010) Zscan4 regulates telomere elongation and genomic  
865 stability in ES cells. *Nature* **464**: 858-63
- 866 47. Inoue A, Jiang L, Lu F, Zhang Y (2017) Genomic imprinting of Xist by maternal  
867 H3K27me3. *Genes Dev* **31**: 1927-1932
- 868 48. Machaty Z, Paldi A, Csaki T, Varga Z, Kiss I, Barandi Z, Vajta G (1993) Biopsy and sex  
869 determination by PCR of IVF bovine embryos. *J Reprod Fertil* **98**: 467-70
- 870 49. Inoue K, Kohda T, Sugimoto M, Sado T, Ogonuki N, Matoba S, Shiura H, Ikeda R,  
871 Mochida K, Fujii T, *et al.* (2010) Impeding Xist expression from the active X chromosome  
872 improves mouse somatic cell nuclear transfer. *Science* **330**: 496-9
- 873 50. Matoba S, Wang H, Jiang L, Lu F, Iwabuchi KA, Wu X, Inoue K, Yang L, Press W, Lee  
874 JT, *et al.* (2018) Loss of H3K27me3 Imprinting in Somatic Cell Nuclear Transfer Embryos  
875 Disrupts Post-Implantation Development. *Cell Stem Cell* **23**: Published online July 19,  
876 2018. <https://doi.org/10.1016/j.stem.2018.06.008>.
- 877 51. Szabo PE, Hubner K, Scholer H, Mann JR (2002) Allele-specific expression of imprinted  
878 genes in mouse migratory primordial germ cells. *Mech Dev* **115**: 157-60
- 879 52. Zhang M, Wang F, Kou Z, Zhang Y, Gao S (2009) Defective chromatin structure in  
880 somatic cell cloned mouse embryos. *J Biol Chem* **284**: 24981-7

- 881 53. Xie B, Zhang H, Wei R, Li Q, Weng X, Kong Q, Liu Z (2016) Histone H3 lysine 27  
882 trimethylation acts as an epigenetic barrier in porcine nuclear reprogramming.  
883 *Reproduction* **151**: 9-16
- 884 54. Bai GY, Song SH, Zhang YW, Huang X, Huang XW, Sun RZ, Lei L (2018) Kdm6a  
885 overexpression improves the development of cloned mouse embryos. *Zygote* **26**: 24-32
- 886 55. Bao S, Miyoshi N, Okamoto I, Jenuwein T, Heard E, Azim Surani M (2005) Initiation of  
887 epigenetic reprogramming of the X chromosome in somatic nuclei transplanted to a  
888 mouse oocyte. *EMBO Rep* **6**: 748-54
- 889 56. Zhao W, Li Q, Ayers S, Gu Y, Shi Z, Zhu Q, Chen Y, Wang HY, Wang RF (2013) Jmjd3  
890 inhibits reprogramming by upregulating expression of INK4a/Arf and targeting PHF20 for  
891 ubiquitination. *Cell* **152**: 1037-50
- 892 57. Mansour AA, Gafni O, Weinberger L, Zviran A, Ayyash M, Rais Y, Krupalnik V, Zerbib M,  
893 Amann-Zalcenstein D, Maza I, *et al.* (2012) The H3K27 demethylase Utx regulates  
894 somatic and germ cell epigenetic reprogramming. *Nature* **488**: 409-13
- 895 58. Inoue A, Jiang L, Lu F, Suzuki T, Zhang Y (2017) Maternal H3K27me3 controls DNA  
896 methylation-independent imprinting. *Nature* **547**: 419-424
- 897 59. Okae H, Matoba S, Nagashima T, Mizutani E, Inoue K, Ogonuki N, Chiba H, Funayama  
898 R, Tanaka S, Yaegashi N, *et al.* (2014) RNA sequencing-based identification of aberrant  
899 imprinting in cloned mice. *Hum Mol Genet* **23**: 992-1001
- 900 60. Mitrecic D, Huzak M, Curlin M, Gajovic S (2005) An improved method for determination  
901 of gene copy numbers in transgenic mice by serial dilution curves obtained by real-time  
902 quantitative PCR assay. *J Biochem Biophys Methods* **64**: 83-98
- 903 61. Marden JJ, Harraz MM, Williams AJ, Nelson K, Luo M, Paulson H, Engelhardt JF (2007)  
904 Redox modifier genes in amyotrophic lateral sclerosis in mice. *J Clin Invest* **117**: 2913-9
- 905 62. Ittner LM, Gotz J (2007) Pronuclear injection for the production of transgenic mice. *Nat*  
906 *Protoc* **2**: 1206-15
- 907 63. Kishigami S, Wakayama S, Thuan NV, Ohta H, Mizutani E, Hikichi T, Bui HT, Balbach S,  
908 Ogura A, Boiani M, *et al.* (2006) Production of cloned mice by somatic cell nuclear  
909 transfer. *Nat Protoc* **1**: 125-38
- 910 64. Yoshida N, Perry AC (2007) Piezo-actuated mouse intracytoplasmic sperm injection  
911 (ICSI). *Nat Protoc* **2**: 296-304

- 912 65. Ross PJ, Ragina NP, Rodriguez RM, Iager AE, Siripattarapivat K, Lopez-Corrales N,  
913 Cibelli JB (2008) Polycomb gene expression and histone H3 lysine 27 trimethylation  
914 changes during bovine preimplantation development. *Reproduction* **136**: 777-85
- 915 66. Gao Y, Hyttel P, Hall VJ (2010) Regulation of H3K27me3 and H3K4me3 during early  
916 porcine embryonic development. *Mol Reprod Dev* **77**: 540-9
- 917 67. Aoshima K, Inoue E, Sawa H, Okada Y (2015) Paternal H3K4 methylation is required for  
918 minor zygotic gene activation and early mouse embryonic development. *EMBO Rep* **16**:  
919 803-12
- 920 68. Tan K, An L, Miao K, Ren L, Hou Z, Tao L, Zhang Z, Wang X, Xia W, Liu J, *et al.* (2016)  
921 Impaired imprinted X chromosome inactivation is responsible for the skewed sex ratio  
922 following in vitro fertilization. *Proc Natl Acad Sci U S A* **113**: 3197-202
- 923 69. Fukuda A, Tomikawa J, Miura T, Hata K, Nakabayashi K, Eggan K, Akutsu H, Umezawa  
924 A (2014) The role of maternal-specific H3K9me3 modification in establishing imprinted  
925 X-chromosome inactivation and embryogenesis in mice. *Nat Commun* **5**: 5464
- 926 70. Mizutani E, Yamagata K, Ono T, Akagi S, Geshi M, Wakayama T (2012) Abnormal  
927 chromosome segregation at early cleavage is a major cause of the full-term  
928 developmental failure of mouse clones. *Dev Biol* **364**: 56-65
- 929  
930

931 **Figure legends**

932 **Figure. 1 The most of SCNT reconstructed embryos are ZGA failure.**

933 A. Schematic view of the transgenic mice, ICSI and SCNT experiments. ♂ and ♀ indicated  
934 the male and female, respectively.

935 B. Representative immunofluorescence and live-cell images of dynamics MERVL::tdTomato  
936 and Gag expression during embryos preimplantation development (upper).  
937 Quantification of tdTomato and Gag intensity (bottom). For the live-cell images, average  
938 intensity of tdTomato signal intensities relative to 2-cell stage embryos. For the  
939 immunofluorescence images, bar graphs showing the relative intensities of Gag/DAPI  
940 signal ratio. N, total number of embryos analyzed for each condition. Error bars, *s.d.*,  $n \geq$   
941 4.  $**P < 0.01$ ,  $***P < 0.001$  by two-tailed Student's  $s_{\text{SEP}}^2$  *t*-test. Scale bar, 20  $\mu\text{m}$ .

942 C. Western blot analysis MERVL::tdTomato levels in MII oocyte and embryos at the indicated  
943 stages (upper). GAPDH was used as a loading control. Numbers below the western blots  
944 indicate band intensity (normalized to total GAPDH) measured by using ImageJ software.  
945 Quantification of western blot results (bottom). M, morula; B, blastocyst. Error bars, *s.d.*,  
946  $n = 3$ .  $**P < 0.01$ ,  $***P < 0.001$  by two-tailed Student's  $s_{\text{SEP}}^2$  *t*-test. Uncropped western blot  
947 and Ponceau S staining demonstrates equivalent loading of each lane are shown in  
948 Appendix figure S1D.

949 D. Representative fluorescence image of 2-cell embryos derived from ICSI or SCNT. The  
950 SCNT embryos produced by transfer of MERVL::tdTomato cumulus cell into WT  
951 enucleated oocytes. ICSI embryos produced by MERVL::tdTomato sperm and MII  
952 oocytes from the littermates of transgenic mice.

953 E. The summary of tdTomato<sup>+</sup> 2-cell embryos derived from ICSI or SCNT. N, total number of  
954 embryos analyzed for each condition. Error bars, *s.d.*,  $n \geq 3$ .  $***P < 0.001$  by two-tailed  
955 Student's  $s_{\text{SEP}}^2$  *t*-test.

956 F. The endogenous MERVL was up-regulated significantly in ICSI embryos compared with  
957 SCNT embryos at 2-cell stages, as determined by RT-qPCR. Error bars, *s.e.m.*,  $n \geq 3$ .

- 958 G. RT-qPCR data for select ZGA genes activated following MERVL::tdTomato expression in  
959 mouse 2-cell embryos derived from ICSI or SCNT. Results were normalized based on  
960 the geometric mean of the expression levels of two reference genes (Ywhaz and Gapdh).  
961 Error bars, *s.e.m.*,  $n = 3$ . \*\*\* $P < 0.001$  by two-tailed Student's  $t$ -test.
- 962 H. Representative images of tdTomato<sup>+</sup> and tdTomato<sup>-</sup> embryos derived from ICSI or SCNT,  
963 after 4.5 days of culturing *in vitro*. Scale bar, 100  $\mu\text{m}$ .
- 964 I. Preimplantation development rates in the tdTomato<sup>+</sup> and tdTomato<sup>-</sup> embryos derived from  
965 ICSI or SCNT. The efficiency was calculated based on the number of 2-cell embryo that  
966 have been divided into tdTomato<sup>+</sup> and tdTomato<sup>-</sup> groups. Error bars, *s.d.*,  $n \geq 3$ .

967

968 **Figure. 2 The effect of ZGA on the SCNT embryo quality.**

- 969 A. Schematics of the live-cell imaging experiments. embryo imaged from pronuclei until  
970 blastocyst stage and transferred to pseudopregnant females.
- 971 B. Representative live-cell images of dynamics MERVL::tdTomato expression during SCNT  
972 embryos preimplantation development. The selected images from a series acquired  
973 every 15 min. The time after starting observation is shown on the upper right corner of  
974 each image. Scale bar, 50  $\mu\text{m}$ .
- 975 C. Representative DAPI staining of blastocysts of tdTomato<sup>+</sup> and tdTomato<sup>-</sup> SCNT embryos  
976 after 115 hr of culture *in vitro*. Scale bar, 50  $\mu\text{m}$ .
- 977 D. The tdTomato<sup>+</sup> and tdTomato<sup>-</sup> SCNT blastocyst cell numbers were determined by  
978 counting the DAPI-stained cells. N, total number of embryos analyzed for each condition.  
979 Red bars indicated the mean value. \*\*\* $P < 0.001$  by two-tailed Student's  $t$ -test.
- 980 E. Immunofluorescence images of tdTomato<sup>+</sup> and tdTomato<sup>-</sup> blastocysts derived from SCNT.  
981 Nanog (ICM) and Cdx2 (TE) were used as lineage markers. Representative images from  
982  $\geq 55$  embryos analyzed in four independent micromanipulations are shown. Scale bar,  
983 50  $\mu\text{m}$ .

- 984 F. Representative image of tdTomato<sup>+</sup> and tdTomato<sup>-</sup> SCNT embryos retrieved at E6.5. The  
985 tdTomato<sup>+</sup> SCNT embryo displays normal egg cylinder morphology. By contrast, the  
986 tdTomato<sup>-</sup> SCNT embryo shows abnormal morphology. Epi, embryonic epiblast; ExEm,  
987 extraembryonic ectoderm; EPC, ectoplacental cone. Scale bar, 50  $\mu$ m.
- 988 G. The bar chart showing the efficiency of attachment to the feeder cells of SCNT blastocysts.  
989 The efficiency was calculated based on the total number of blastocysts used for NTES  
990 derivation. N, total number of embryos analyzed for each condition. Error bars, *s.d.*,  $n \geq 3$ .  
991 **\*\* $P < 0.01$  by two-tailed Student's  $t$ -test.**
- 992 H. The bar chart shows the efficiency of ntES derivation. The efficiency was calculated based  
993 on the total number of attached blastocysts for NTES derivation. N, total number of  
994 embryos analyzed for each condition. Error bars, *s.d.*,  $n \geq 3$ . **\*\* $P < 0.01$  by two-tailed  
995 Student's  $t$ -test.**
- 996 I. RT-qPCR analysis for somatic cell genes in SCNT 1-cell embryos, 2-cell tdTomato<sup>+</sup>, and  
997 2-cell tdTomato<sup>-</sup> embryos. Results were normalized based on the geometric mean of the  
998 expression levels of two reference genes (Ywhaz and Gapdh). Error bars, *s.e.m.*,  $n = 3$ .  
999 **\*\*\* $P < 0.001$  by two-tailed Student's  $t$ -test.**

1000

1001 **Figure. 3 Abnormal H3K27me3 modification of SCNT embryos at the 2-cell stage.**

- 1002 A. Immunofluorescence images of ICSI, SCNT-tdTomato<sup>+</sup> and SCNT-tdTomato<sup>-</sup> embryos.  
1003 Embryos approximately 26hr after activation were fixed and processed for  
1004 immunostaining with antibodies to H3K27me3 and Gag protein. ICSI embryos produced  
1005 by MERVL::tdTomato sperm from the littermates of male mice. The images are  
1006 representative examples of the quantification shown in Fig 3B. Representative images  
1007 from  $\geq 128$  embryos analyzed in five independent micromanipulations are shown. Scale  
1008 bar, 20  $\mu$ m.
- 1009 B. Percentage of 2-cell ICSI and SCNT embryos with strong H3K27me3 staining and  
1010 moderate staining (left). Numbers of the total embryos analyzed from five independent  
1011 micromanipulations are shown in the bars. Boxplots for relative intensities of H3K27me3

1012 from five independent experiments for each expression as in Fig 3A (right). Error bars,  
1013 *s.e.m.*, \*\*\* $P < 0.001$  by two-tailed Student's  $t$ -test.

1014 C. Western blot results showing H3K27me3 levels in SCNT and ICSI embryos.  $\alpha$ -Tubulin  
1015 (TUBB) was blotted as a loading control. Uncropped western blot and Ponceau S  
1016 staining demonstrates equivalent loading of each lane are shown in Appendix figure  
1017 S3E.

1018 D. Representative immunofluorescent staining of H3K27me3 in ICSI embryos at the 1-cell  
1019 stage. ICSI 1-cell embryos are characterised by the visualisation of two distinct pronuclei  
1020 (2PN) 6 hours after sperm injection. H3K27me3 enrichment in the female-PN. The  
1021 identity of the pronuclei was determined by their size and position relative to the polar  
1022 body. Representative images from  $\geq 95$  embryos analyzed in four independent  
1023 micromanipulations are shown. The optical Z-section series images are shown in  
1024 Appendix figure S3G. ♂ and ♀ indicated the male and female, respectively. SY,  
1025 syngamy. Scale bar, 20  $\mu\text{m}$ .

1026 E. Representative immunofluorescent staining of H3K27me3 in SCNT embryos at the 1-cell  
1027 stage. H3K27me3 enrichment in the SCNT embryos were observed with either 1  
1028 pseudo-pronucleus (1PPN), bipseudo-pronucleus (2PPN), or tripseudo-pronucleus  
1029 (3PPN). BA, before activation; AA, after activation. Representative images from  $\geq 55$   
1030 embryos analyzed in three independent micromanipulations are shown. Scale bar, 20  
1031  $\mu\text{m}$ .

1032 F. Dynamic appearance of H3K27me3 during early preimplantation development. Shown are  
1033 representative images of embryos stained with DNA and H3K27me3. Negative staining  
1034 of H3K27me3 could be observed in ICSI and SCNT-tdTomato<sup>-</sup> embryo at morula stage.  
1035 Representative images from  $\geq 83$  embryos analyzed in four independent  
1036 micromanipulations are shown. Scale bar, 20  $\mu\text{m}$ .

1037 G. Representative images of H3K27me3 immunostainings on bovine intraspecies SCNT  
1038 embryos. IVF-derived zygotes were used as a control for comparison. These images are  
1039 representative examples of the quantification shown in H. Representative images from  $\geq$   
1040 100 embryos analyzed in four independent micromanipulations are shown; Scale bar, 20  
1041  $\mu\text{m}$ .



1042 H. The bar chart shows the percentages of strong and moderate H3K27me3 modifications of  
1043 bovine embryos. Numbers of the total embryos analyzed from four independent  
1044 micromanipulations are shown in the bars.

1045

1046 **Figure. 4 Overexpression of KDM6A only improves the blastocyst formation rate of**  
1047 **SCNT embryos, but not full-term development.**

1048 A, B RT-qPCR analysis of KDM6A (A) and KDM6B (B) mRNA levels in SCNT 2-cell embryo.  
1049 Data shown are mean expression values relative to *Gapdh*. The value in ICSI control  
1050 was set as 1. Error bars, *s.e.m.*,  $n \geq 3$ .  $**P < 0.01$  by Student's *t*-test.

1051 C. The sketch of KDM6A and KDM6B *in vitro* transcription vector (right), and the integrity of *in*  
1052 *vitro* transcribed mRNA was confirmed by electrophoresis with formaldehyde gels (left).  
1053 M, marker; T7, *in vitro* transcription promoter; HA, hemagglutinin epitope tag.

1054 D. Immunostaining of SCNT embryo for H3K27me3 and HA epitope tag after injection of  
1055 different mRNA as indicated. Shown are representative images in three independent  
1056 experiments. Representative images from  $\geq 187$  embryos analyzed in four independent  
1057 micromanipulations for each condition are shown. Scale bar, 20  $\mu\text{m}$ .

1058 E. Schematic illustration of mRNA injection into oocytes and SCNT.

1059 F. Representative images of SCNT embryos at 115 h after injection of different mRNA as  
1060 indicated. Scale bar, 50  $\mu\text{m}$ .

1061 G. The bar chart showing the efficiency of blastocyst formation. Injection of KDM6A mRNA  
1062 improved the preimplantation development rate of SCNT embryos. Related to Appendix  
1063 Figure S4C. Error bars, *s.e.m.*,  $n \geq 3$ .  $**P < 0.01$ ,  $***P < 0.001$  by two-tailed Student's  $t$ -test.  
1064 *n.s.*, not significant.

1065 H. Phenotypic analysis of E8.5 SCNT mouse embryos injection with 20 ng/ $\mu\text{l}$  or 50 ng/ $\mu\text{l}$   
1066 KDM6A mRNA (left). Representative images of the KDM6A injected embryos at E19.5  
1067 (right). The injected SCNT embryos were only obtained degenerated embryos. AI,  
1068 allantois; SM, somite. Scale bar, 50  $\mu\text{m}$ .

1069 I. The retrieved rate of embryos assessed at E8.5. The numbers at the bottom of the bars  
1070 indicated the total number of transferred embryos. *n.s.*, not significant; \*\*\* $P < 0.001$  by  
1071 two-tailed Student's *t*-test.

1072 J. KDM6A are broadly expressed proteins characterized by N-terminal TPRs and C-terminal  
1073 JmjC domain. In KDM6B the only clearly identifiable domain is the C-terminal JmjC  
1074 domain. Schematic diagram depicts the position of highly conserved TPR and JmjC  
1075 domain, which are mutated to abolish the protein-protein interactions and demethylation  
1076 functions of KDM6A.

1077 K. Preimplantation development rates in the KDM6A-HA, KDM6B-HA, or  
1078 KDM6A-cM/-nM/-ncM-HA mRNA-injected and non-injected Control SCNT groups. The  
1079 efficiency was calculated based on the number of cleavage embryo. Error bars, *s.d.*, the  
1080 total numbers of cleavage embryos in each condition (KDM6A-HA, KDM6B-HA,  
1081 KDM6A-cM/-nM/-ncM-HA, and Control) from three independent experiments were 275,  
1082 199, 290, 221, 244, and 286, respectively.

1083

1084 **Figure. 5 KDM6B knockdown greatly improved the preimplantation development rate**  
1085 **of SCNT embryos.**

1086 A. The bar chart shows the KDM6A/B transcript levels in SCNT embryos with 20  $\mu$ M  
1087 siRNA-6A/B. All data are mean expression relative to *Gapdh* with control siRNA injected  
1088 SCNT embryos normalized to 1. Error bars, *s.e.m.*,  $n = 3$ , \*\* $P < 0.01$  by Student's *t*-test.

1089 B. Western blot showing the expression of KDM6A and KDM6B in SCNT embryos after  
1090 injection of different siRNA as indicated. Protein lysates from 1,500 embryos were  
1091 loaded in each lane. The results of one representative of two independent experiments  
1092 are presented. Uncropped western blot and Ponceau S staining demonstrates  
1093 equivalent loading of each lane are shown in Appendix Fig S5B.

1094 C. Immunofluorescence staining results showing H3K27me3 of 2-stage SCNT embryos.  
1095 Embryo was injected with siRNA as indicated. The H3K27me3 levels between control  
1096 and double injected with siRNA-6A-6B cannot observe any difference, but a marked

1097 decrease was observed when injected with either siRNA-6A or siRNA-6B. scale bar, 20  
1098  $\mu\text{m}$ .

1099 D. RT-qPCR analysis of KDM6A/B in SCNT embryos injected with siRNA-6A or siRNA-6B.  
1100 The SCNT embryos were subject to injection of 10  $\mu\text{M}$  or 20  $\mu\text{M}$  siRNA as indicated.  
1101 Data are mean expression relative to Gapdh with siRNA-control normalized to 1. Error  
1102 bars, *s.e.m.*,  $n = 3$ . \*\* $P < 0.01$ , \*\*\* $P < 0.001$  according to two-tailed Student's *t*-test. *n.s.*,  
1103 not significant.

1104 E. Schematic illustration of siRNA injection into oocytes and SCNT.

1105 F. Representative images of SCNT embryos at 115 h after injection of different siRNA as  
1106 indicated. These images are representative examples of the quantification shown in G.  $n$   
1107  $\geq 3$ . Scale bar, 50  $\mu\text{m}$ .

1108 G. Injection of siRNA-6B improved the preimplantation development rate of SCNT embryos.  
1109 Both cumulus cells, Sertoli cells, and C57 MEF cells were used as donor cells. The  
1110 bovine intraspecies SCNT embryos derived from bovine ear fibroblast cells. Shown is  
1111 the percentage of embryos that reached the indicated stages. ♂ and ♀ indicated the  
1112 male and female, respectively. Error bars, *s.d.*,  $n \geq 3$ .

1113 H. RT-qPCR analysis for select ZGA genes in ICSI and SCNT embryos. The SCNT embryo  
1114 was injected with siRNA as indicated. Results were normalized based on the geometric  
1115 mean of the expression levels of two reference genes (Ywhaz and Gapdh). Error bars,  
1116 *s.e.m.*,  $n = 3$ . \* $P < 0.05$ , \*\* $P < 0.01$ , \*\*\* $P < 0.001$  according to two-tailed Student's *t*-test.  
1117 *n.s.*, not significant.

1118

1119 **Figure. 6 KDM6B knockdown improved the SCNT embryo birth rate and DMD-ntES**  
1120 **derivation.**

1121 A. Experimental scheme for generating dual reporter mice and SCNT.

1122 B. Representative fluorescence images of siRNA-control or siRNA-6B injected SCNT  
1123 embryos. Scale bar, 50  $\mu\text{m}$ .

1124 C. Quantification of embryos that expression tdTomato after injection with siRNA-control or  
1125 siRNA-6B. Numbers of observed embryos are indicated.  $n \geq 3$ , Error bars, *s.e.m.*, \*\*\* $P <$   
1126 0.001 according to two-tailed Student's *t*-test.

1127 D. Representative images of green fluorescence in Oct4::EGFP reconstructed blastocysts  
1128 derived from injected siRNA-control or siRNA-6B SCNT embryos. Representative  
1129 images from  $\geq 25$  embryos analyzed in three independent micromanipulations are shown.  
1130 Green fluorescence indicates that the Oct4::EGFP transgene has been expressed.  
1131 Scale bar, 50  $\mu\text{m}$ .

1132 E. Oct4::EGFP was up-regulated significantly in ICSI embryos compared with SCNT embryos  
1133 at blastocyst stages, as determined by RT-qPCR. Data shown are mean expression  
1134 values relative to *Gapdh*. The value in ICSI embryos was set as 1. Error bars, *s.e.m.*,  $n \geq$   
1135 3. \* $P < 0.05$ , \*\*\* $P < 0.001$  by two-tailed Student's *t*-test.

1136 F. Representative image of cloned mice derived by siRNA-6B injected SCNT embryos.

1137 G. Bar graph showing the efficiency of attachment to the feeder cells (left) and  
1138 si6B-mdx-ntES derivation (right). The mdx sick mice tail-tip fibroblasts as nuclear donors.  
1139 N, total number of embryos analyzed for each condition.

1140 H. Immunostaining images of si6B-mdx-ntES expressed pluripotency markers. Scale bar, 50  
1141  $\mu\text{m}$ .

1142 I. The si6B-mdx-ntES possessed multiple-differentiation potential, as shown in embryoid  
1143 body. Scale bar, 100  $\mu\text{m}$ .

1144 J. An image of a chimeric mouse derived from si6B-mdx-ntES.

1145

## 1146 **Figure. 7 Analyses of Molecular Features of knockdown KDM6B assisted SCNT.**

1147 A. Schematic illustration of the experimental procedures. We combined the live-cell imaging,  
1148 blastomere biopsy and single-cell RNA sequencing to accurate analysis.

- 1149 B. Scatter plots comparing the si6B-NT and NT-2 genes expression. The higher expression  
1150 genes in siRNA-6B and NT-2 are colored with red and blue, respectively (FC > 5,  
1151 FPKM >5).
- 1152 C. Heatmap comparing ZGA genes expression between WT-2 and NT-2 and si6B-NT  
1153 embryos (FC > 5, FPKM > 5 in each replicate; left). A total of 1,813 DEGs are classified  
1154 into two groups by unsupervised hierarchical clustering. KEGG and GO analysis of the  
1155 two groups by unsupervised hierarchical clustering (right).
- 1156 D. MA plot comparing gene expression between si6B-NT and NT-2. The data analysed  
1157 derive from two independent biological replicates. Arrows represent data points outside  
1158 of the plotting area. DEG, differentially expressed genes.
- 1159 E. Venn diagram showing the overlap between the genes that failed to be activated in SCNT  
1160 2-cell embryos and derepressed in knock-down KDM6B (left). Heatmap, KEGG and GO  
1161 enrichment showing the expression pattern of 319 overlap genes (FC > 5, FPKM >5;  
1162 right).
- 1163 F. Schematic illustration of the experimental approach.
- 1164 G. Representative localization of Xist expression in the nuclei of SCNT embryos injected with  
1165 siRNA-6A, siRNA-6B or siRNA-Xist (left). Arrows indicate the blastomeres enlarged in  
1166 the bottom panels. The ratios of blastomeres classified according to the positive or  
1167 negative expression of Xist analyzed by RNA FISH (right). Each bar represents a single  
1168 embryo.
- 1169 H. Large-scale qPCR analysis of Xist and eight X-linked genes in 4-cell stage male embryo.  
1170 Each rectangle bar represents the expression value detected by single embryo  
1171 RT-qPCR. The number of embryos in each group is indicated. Coloured bars indicate  
1172 expression levels.
- 1173 I. Image of full-term cloned pups derived from NT Sertoli cells injected with siRNA-control,  
1174 siRNA-Xist, or siRNA-Xist-6B.

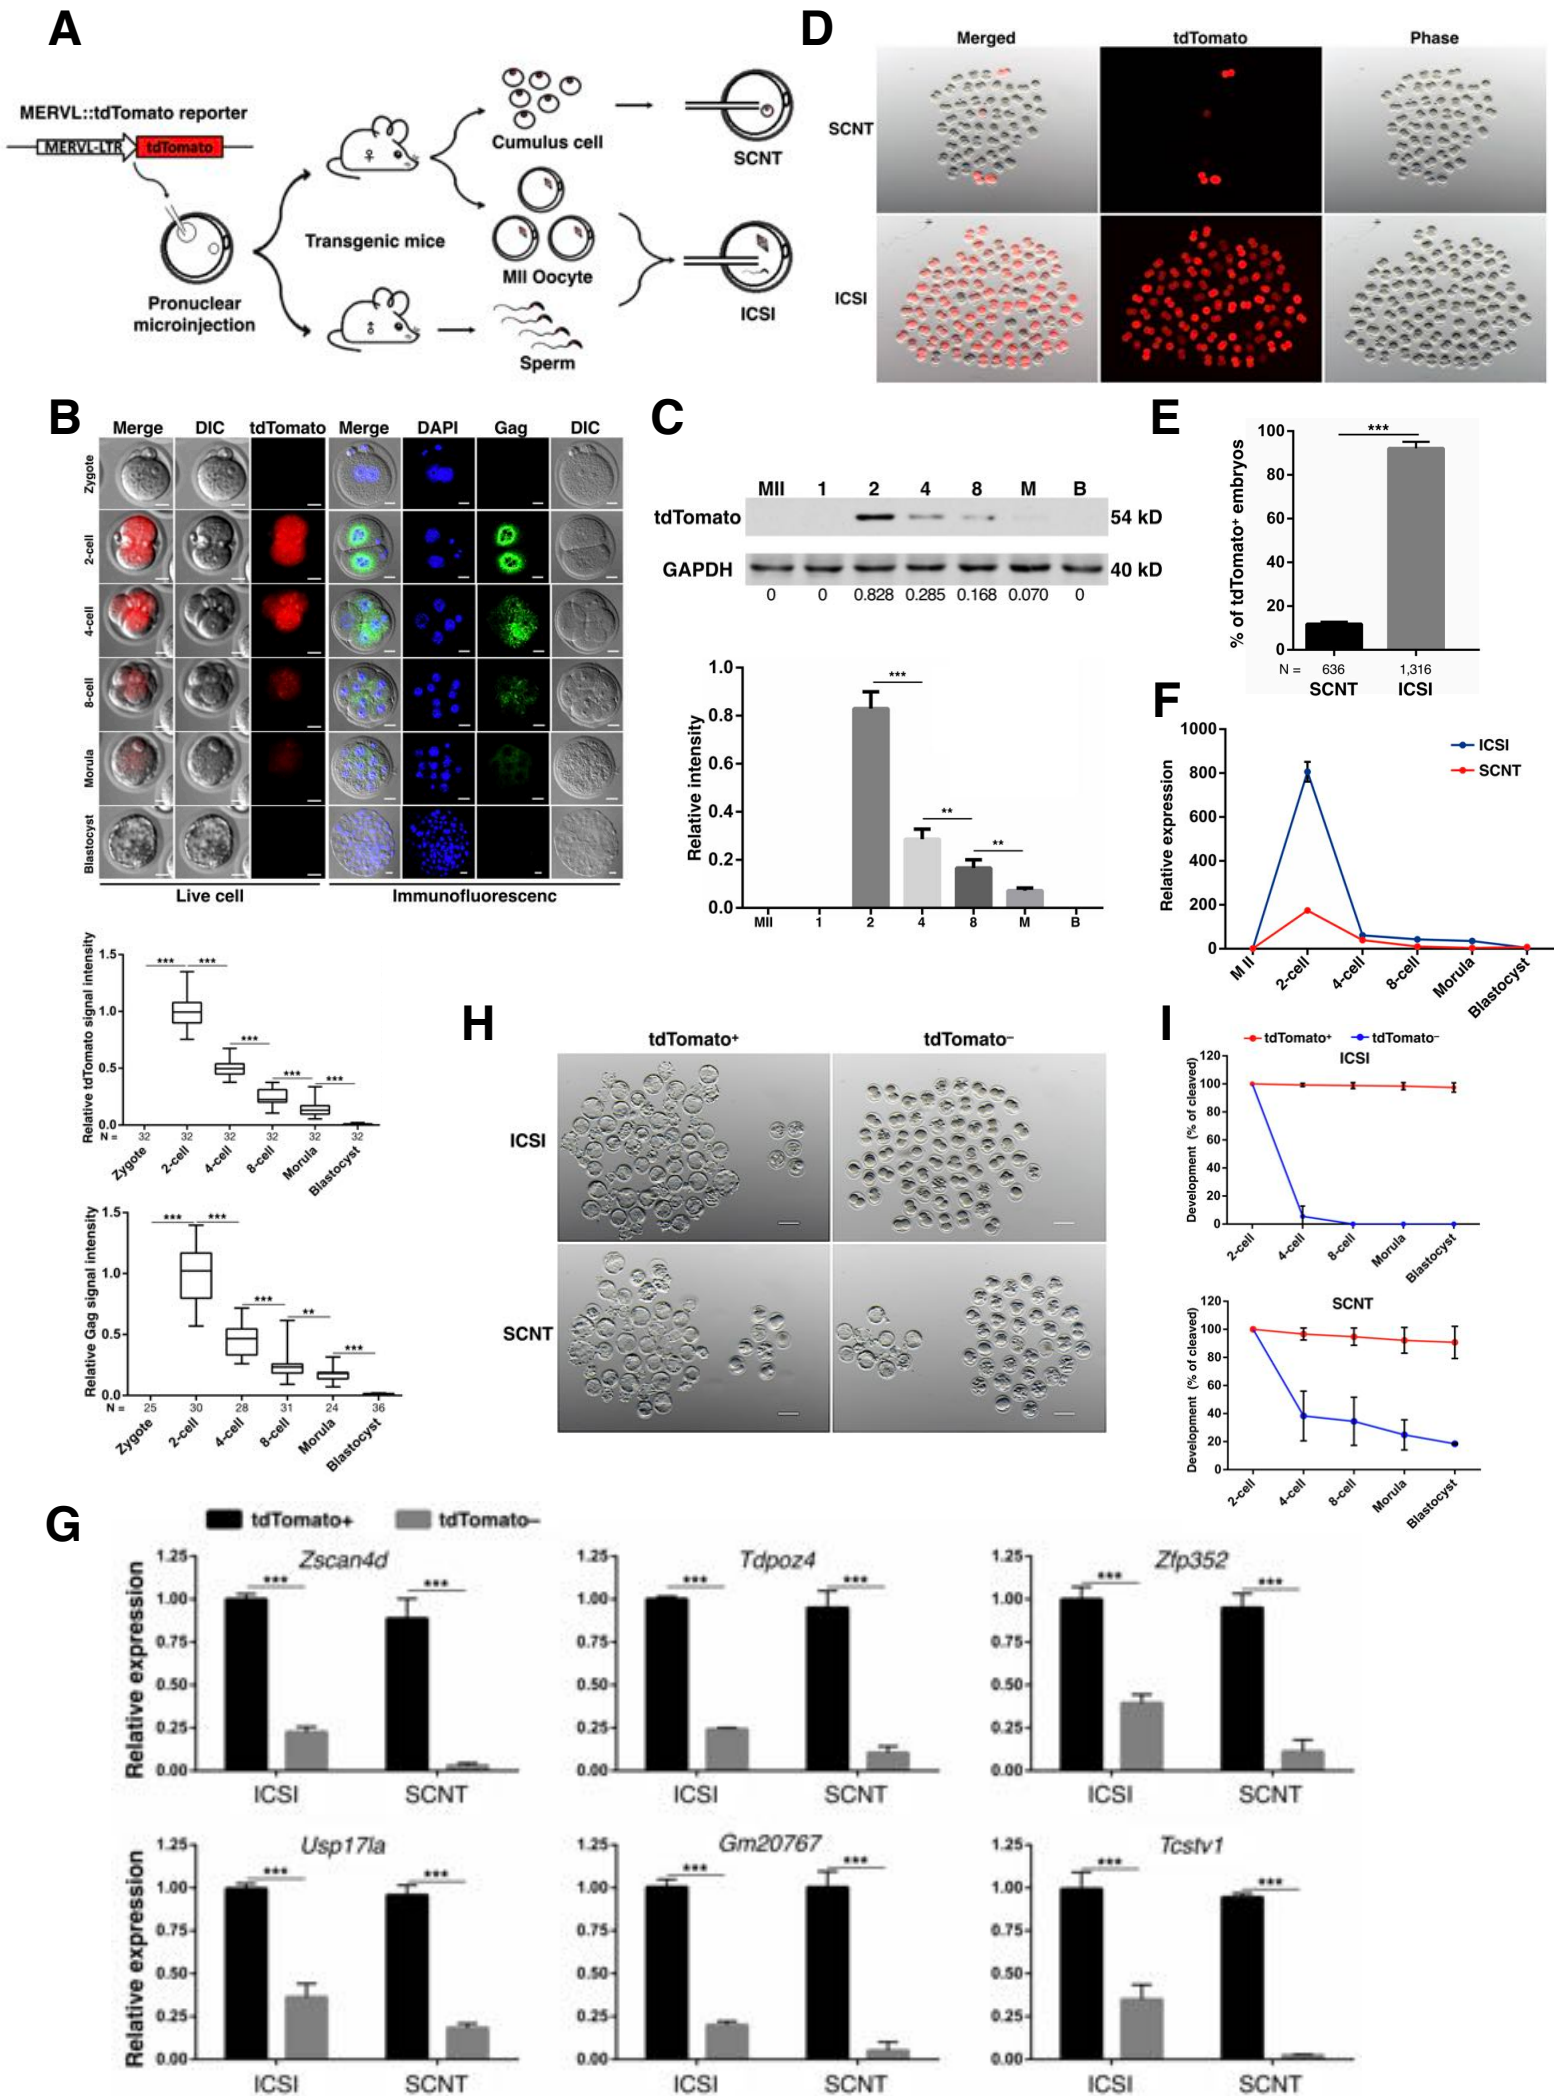



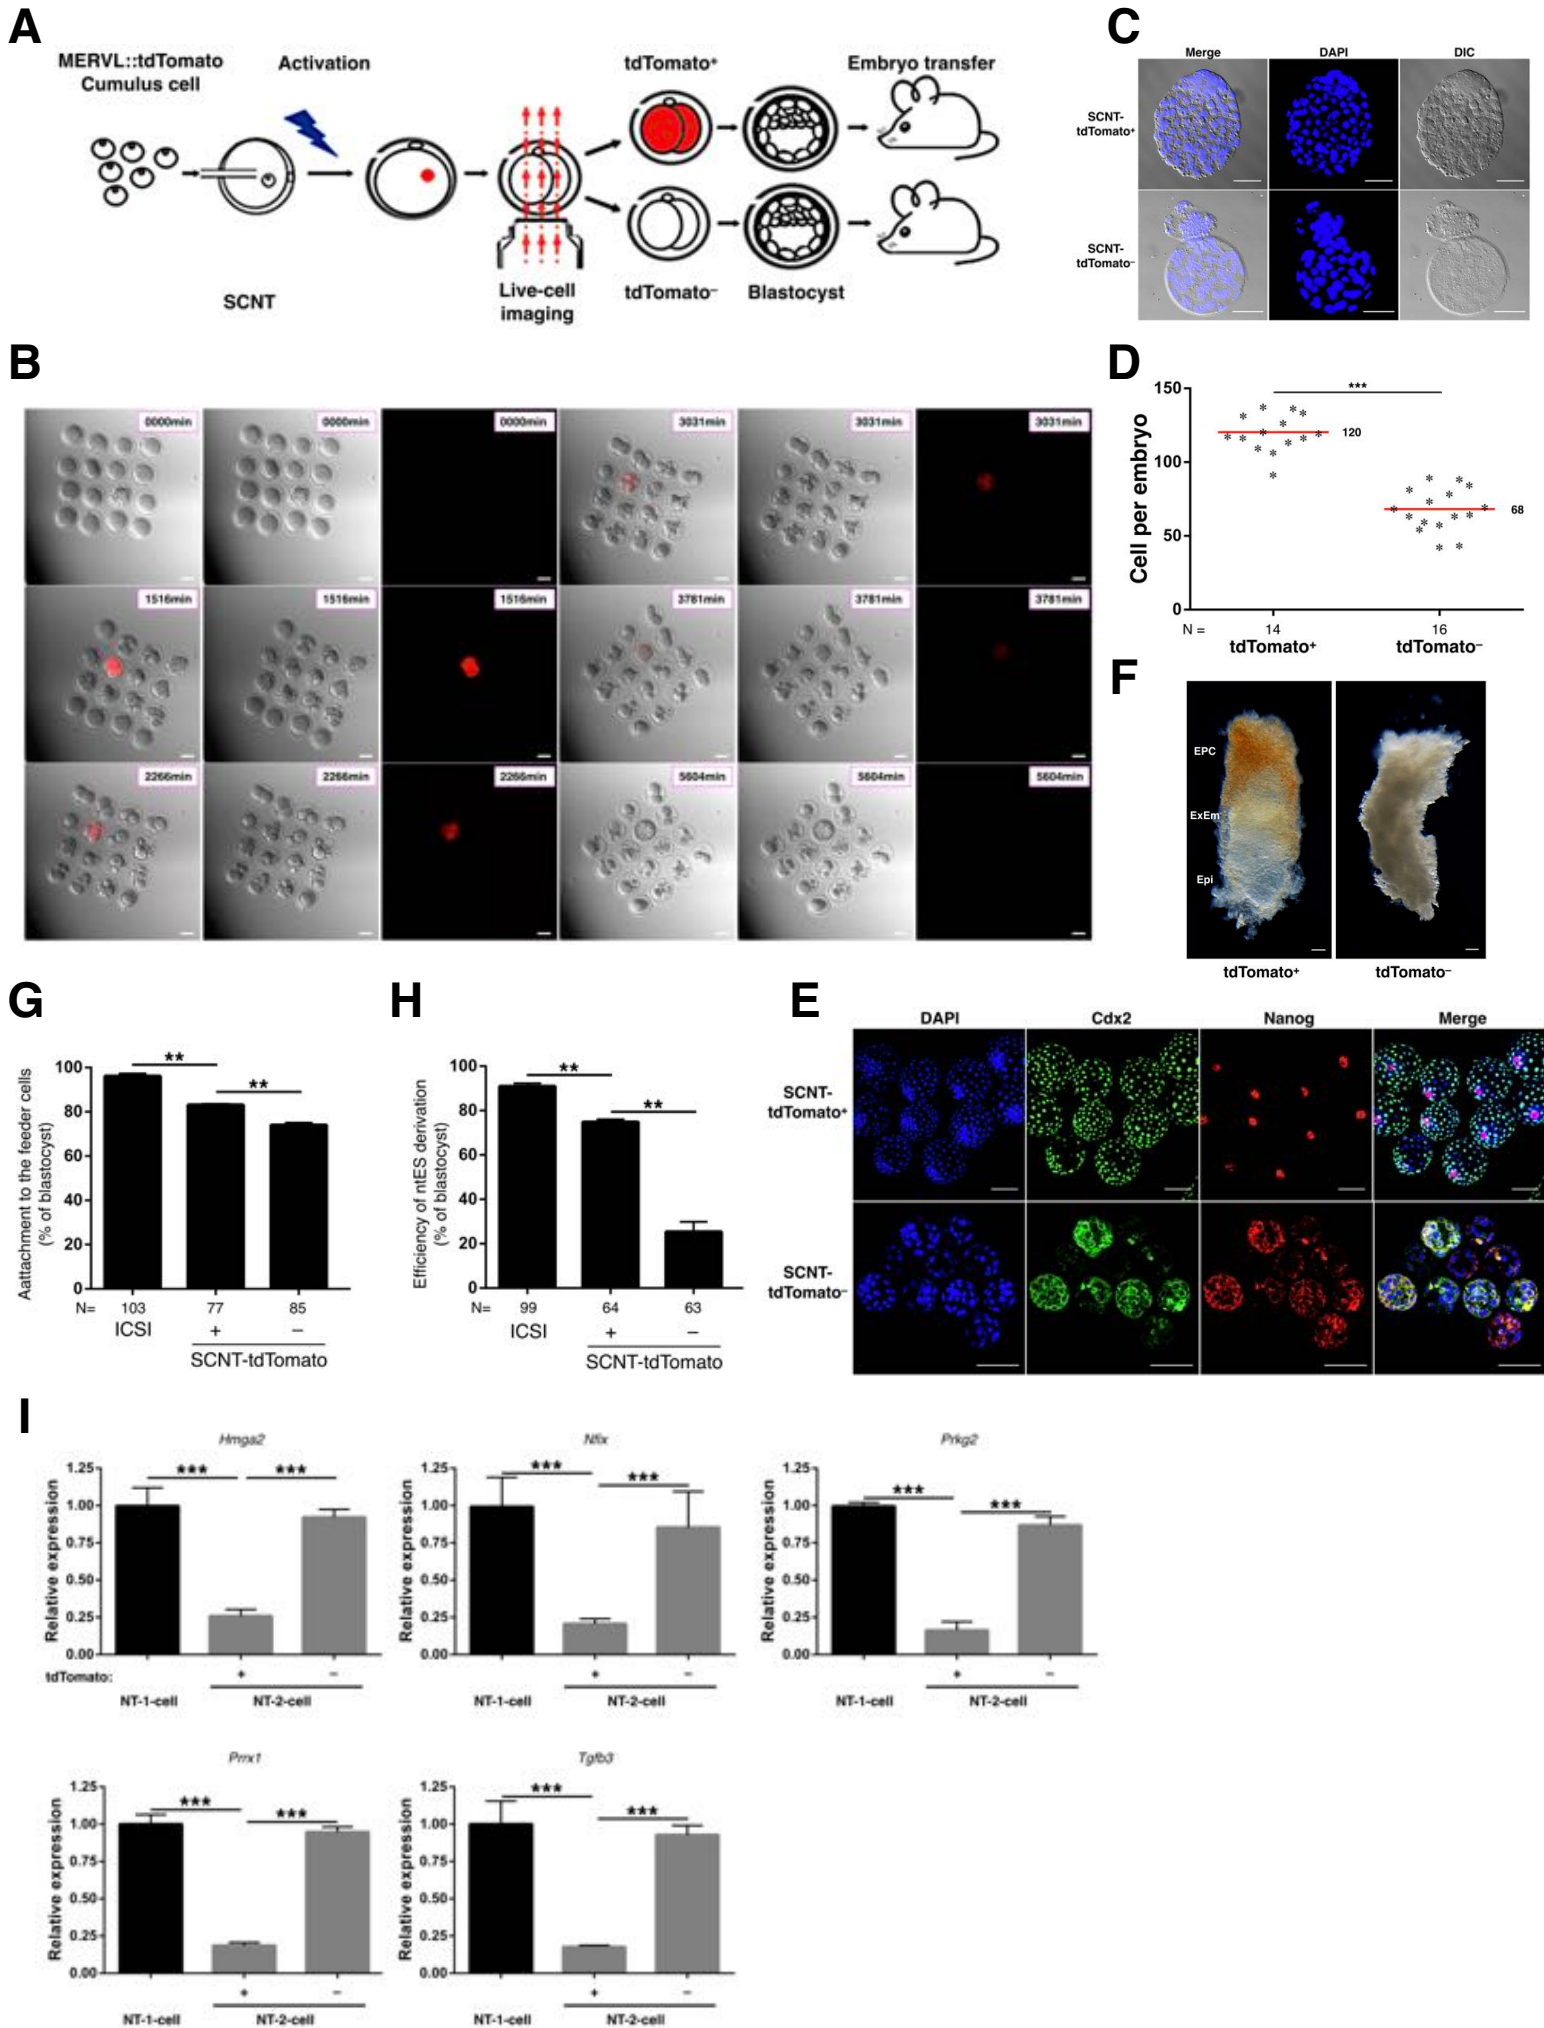



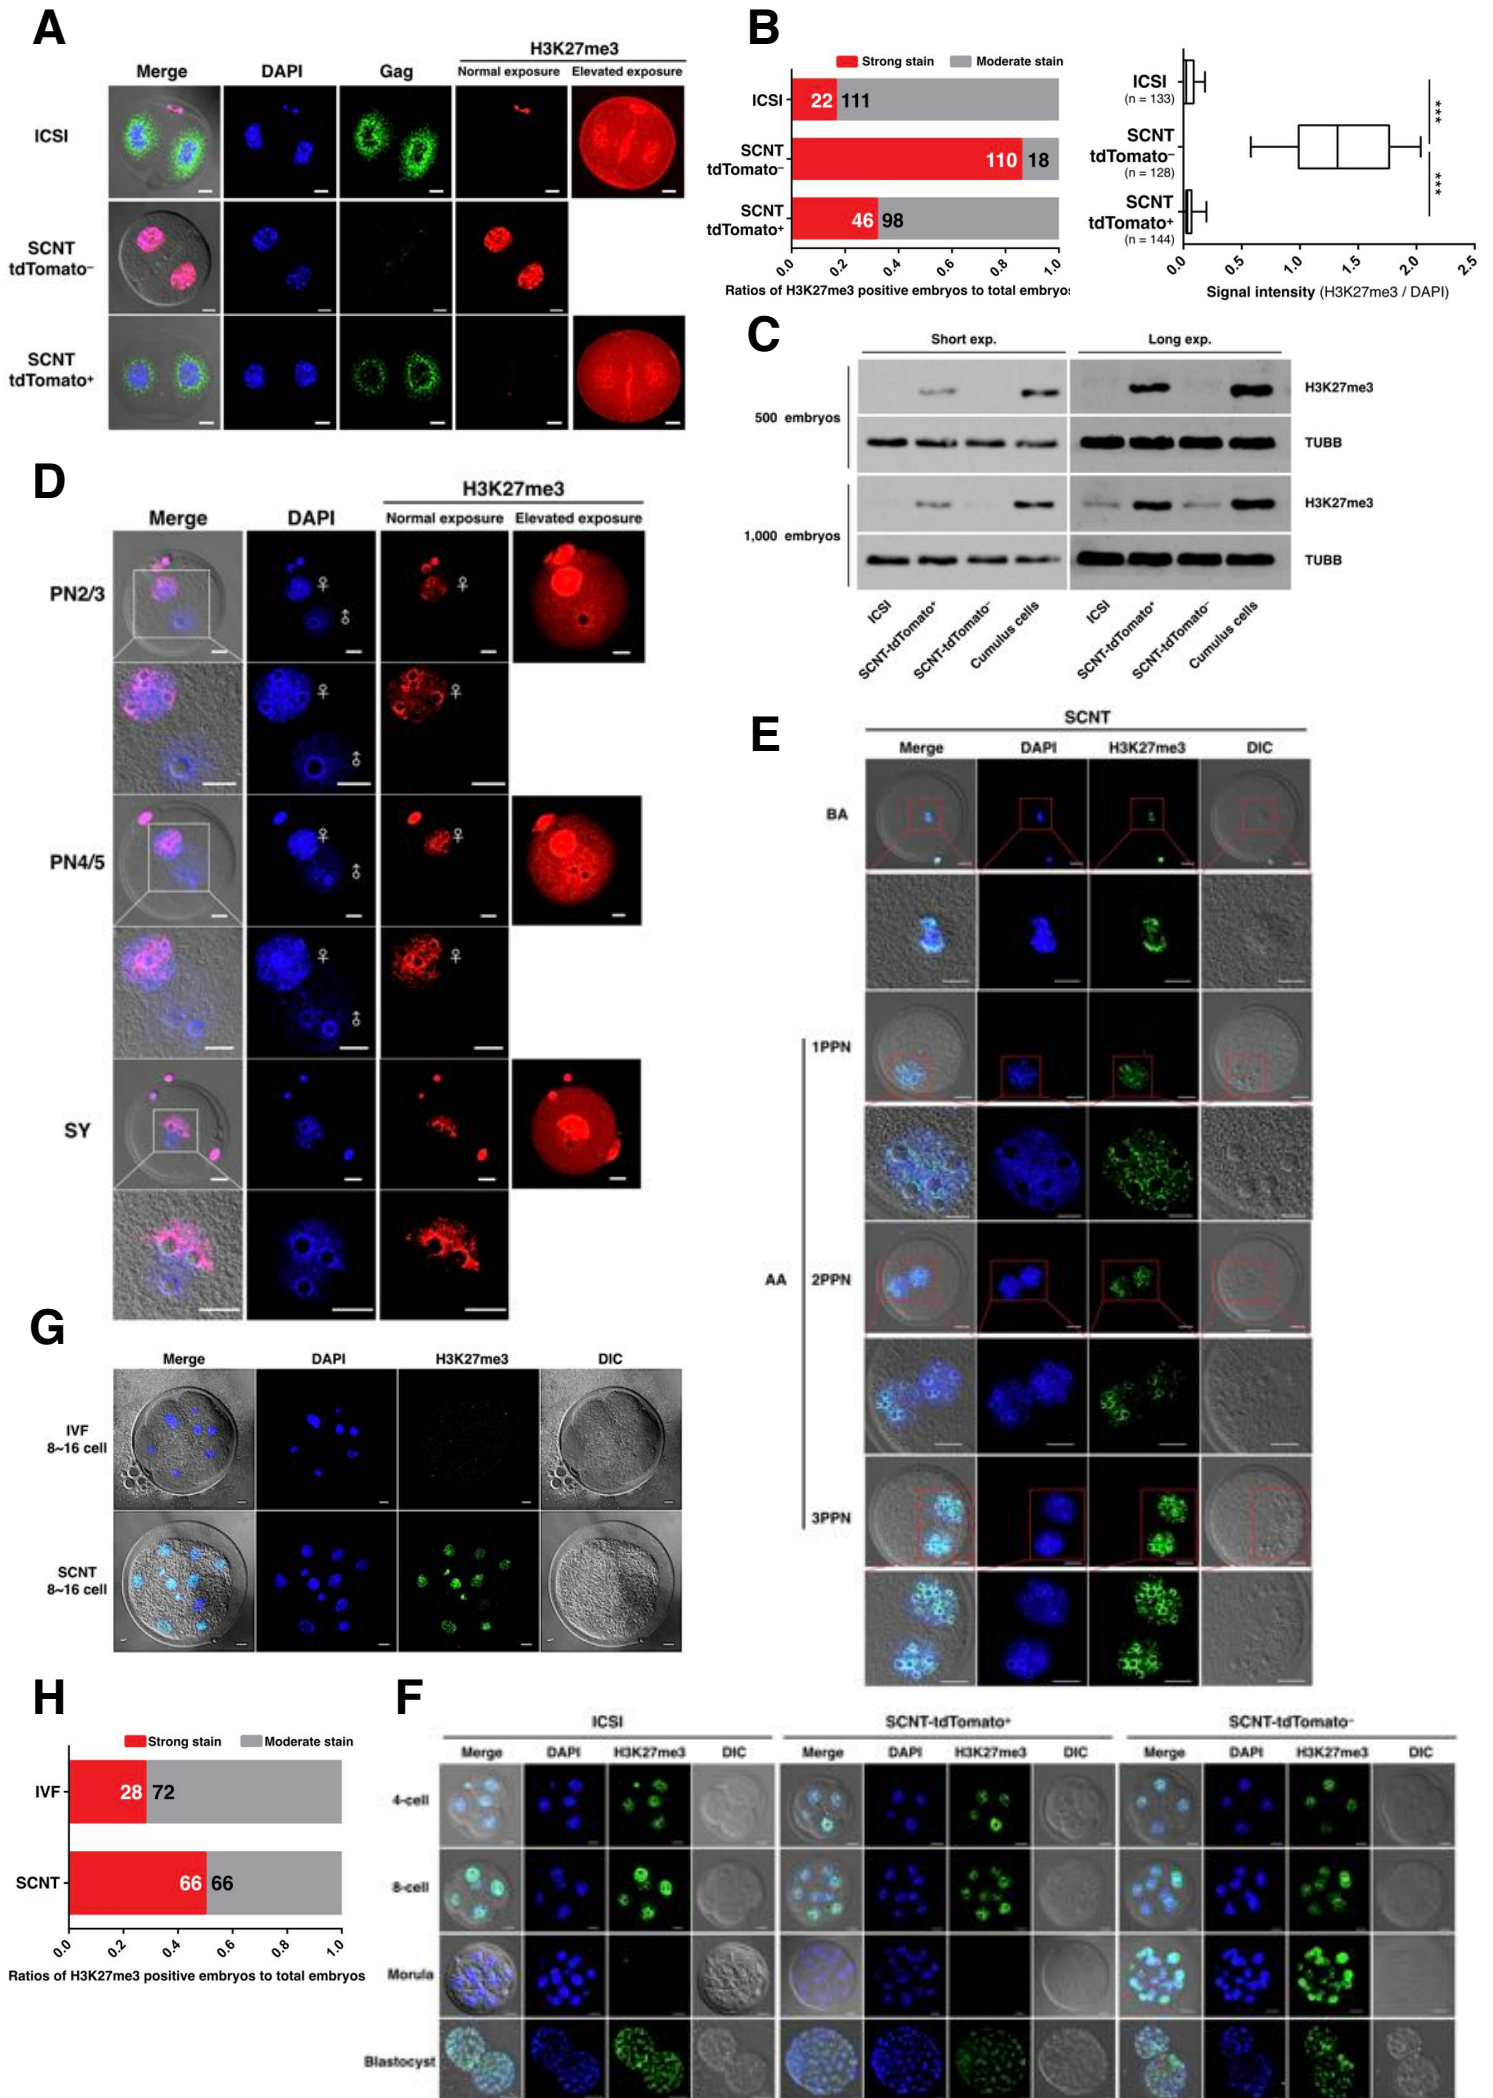

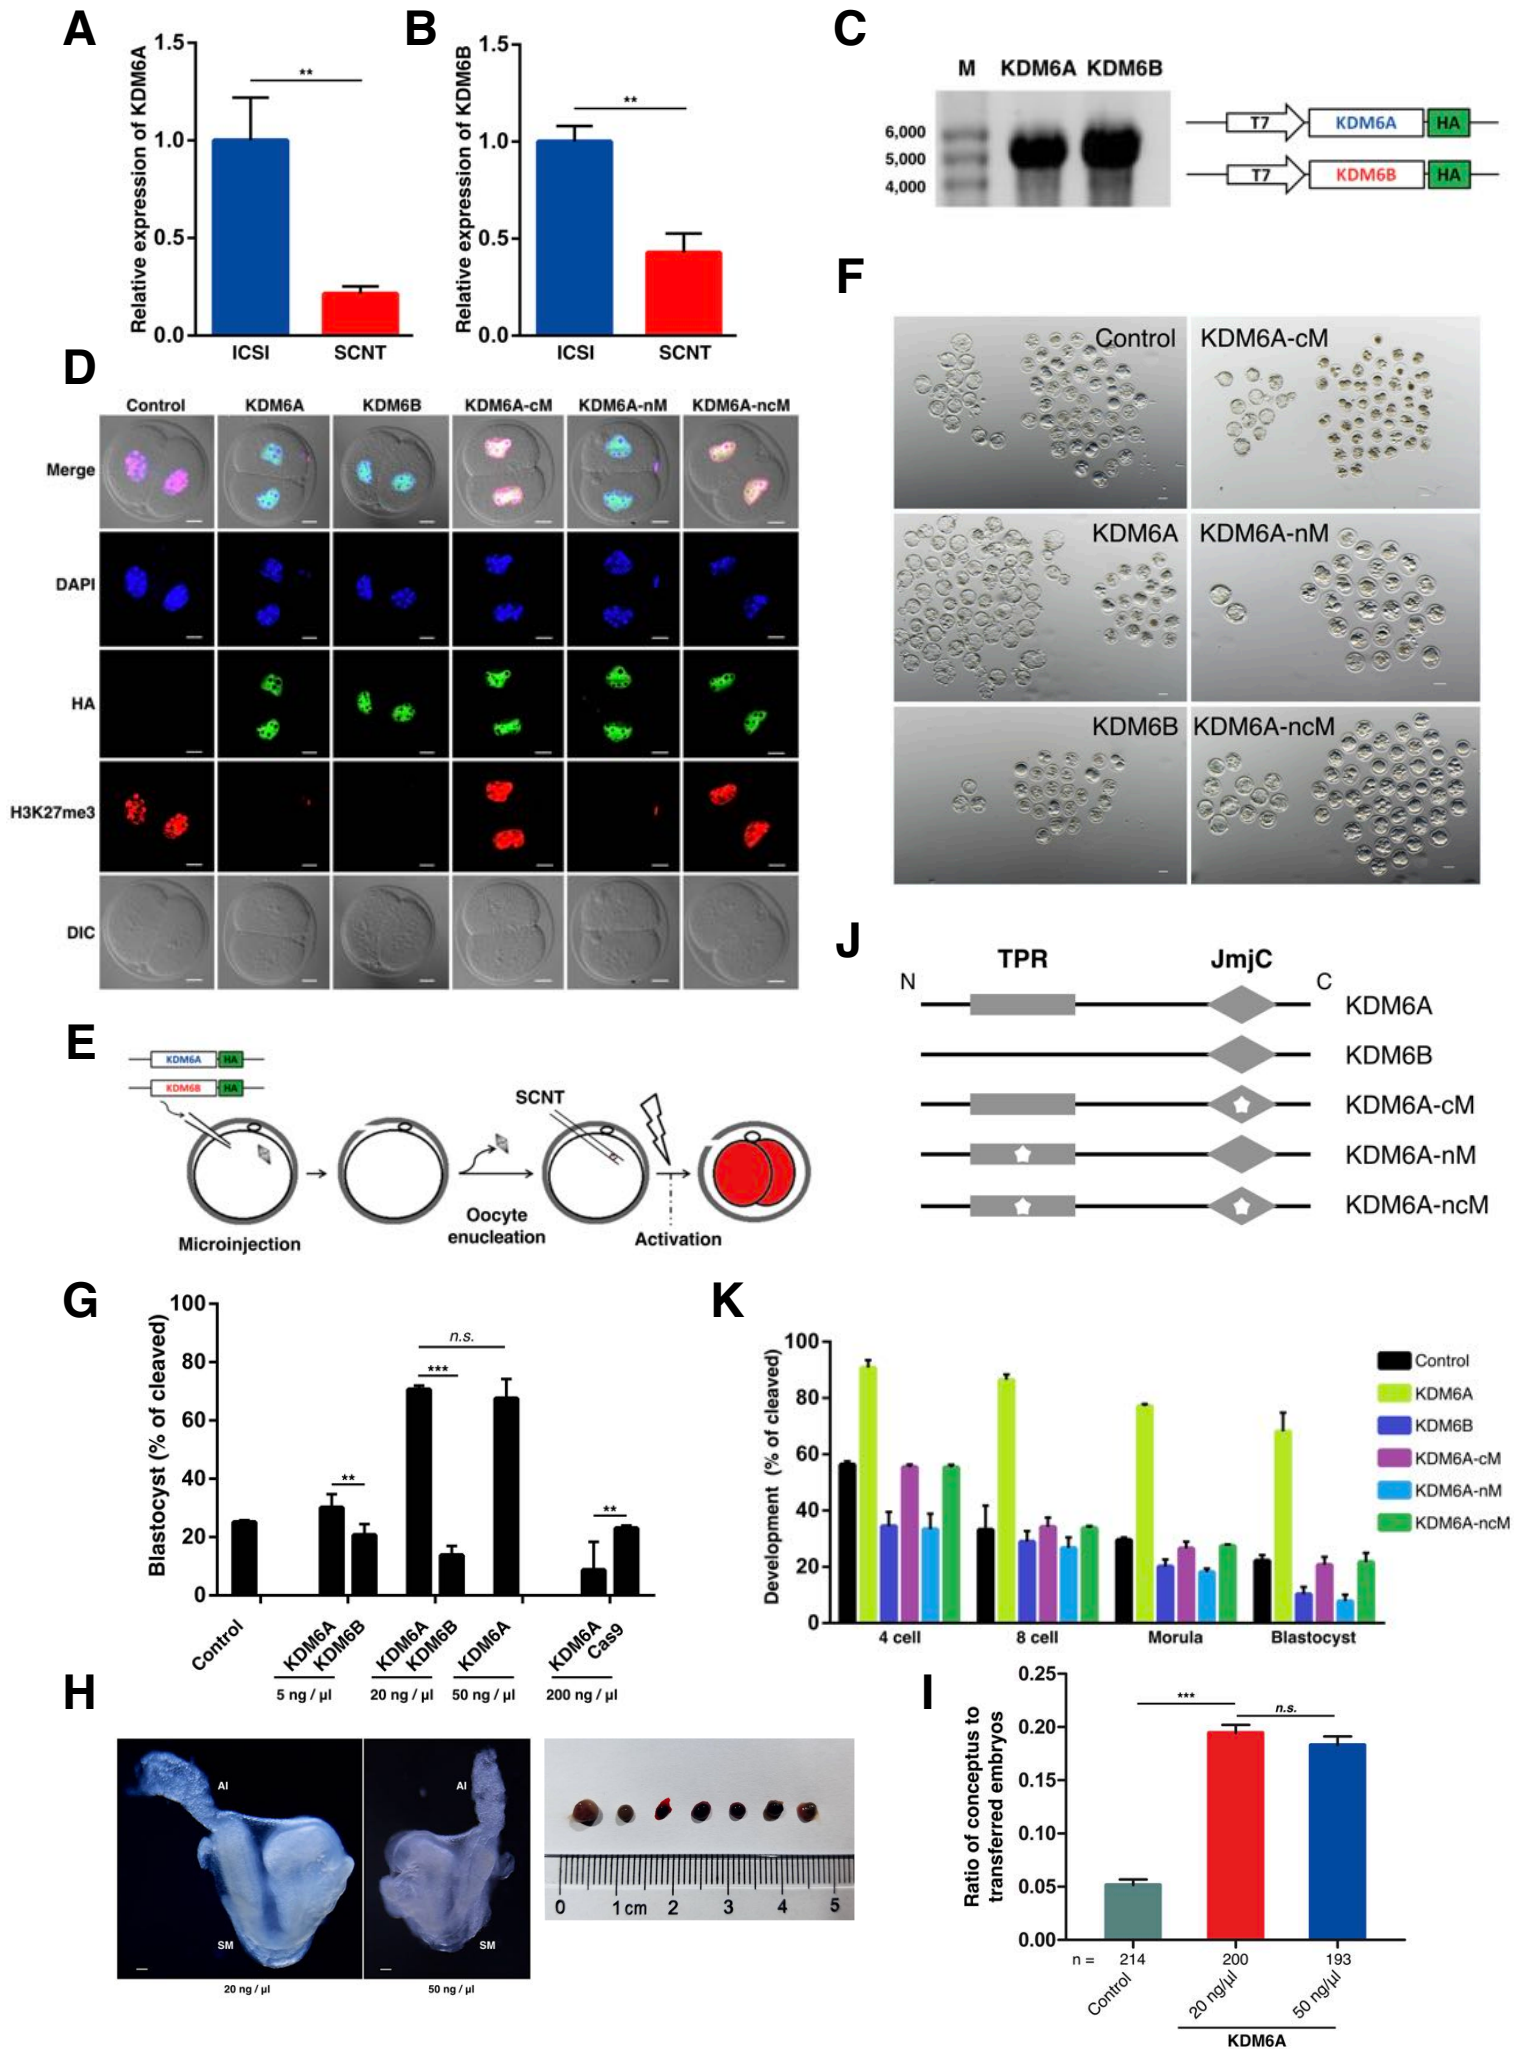



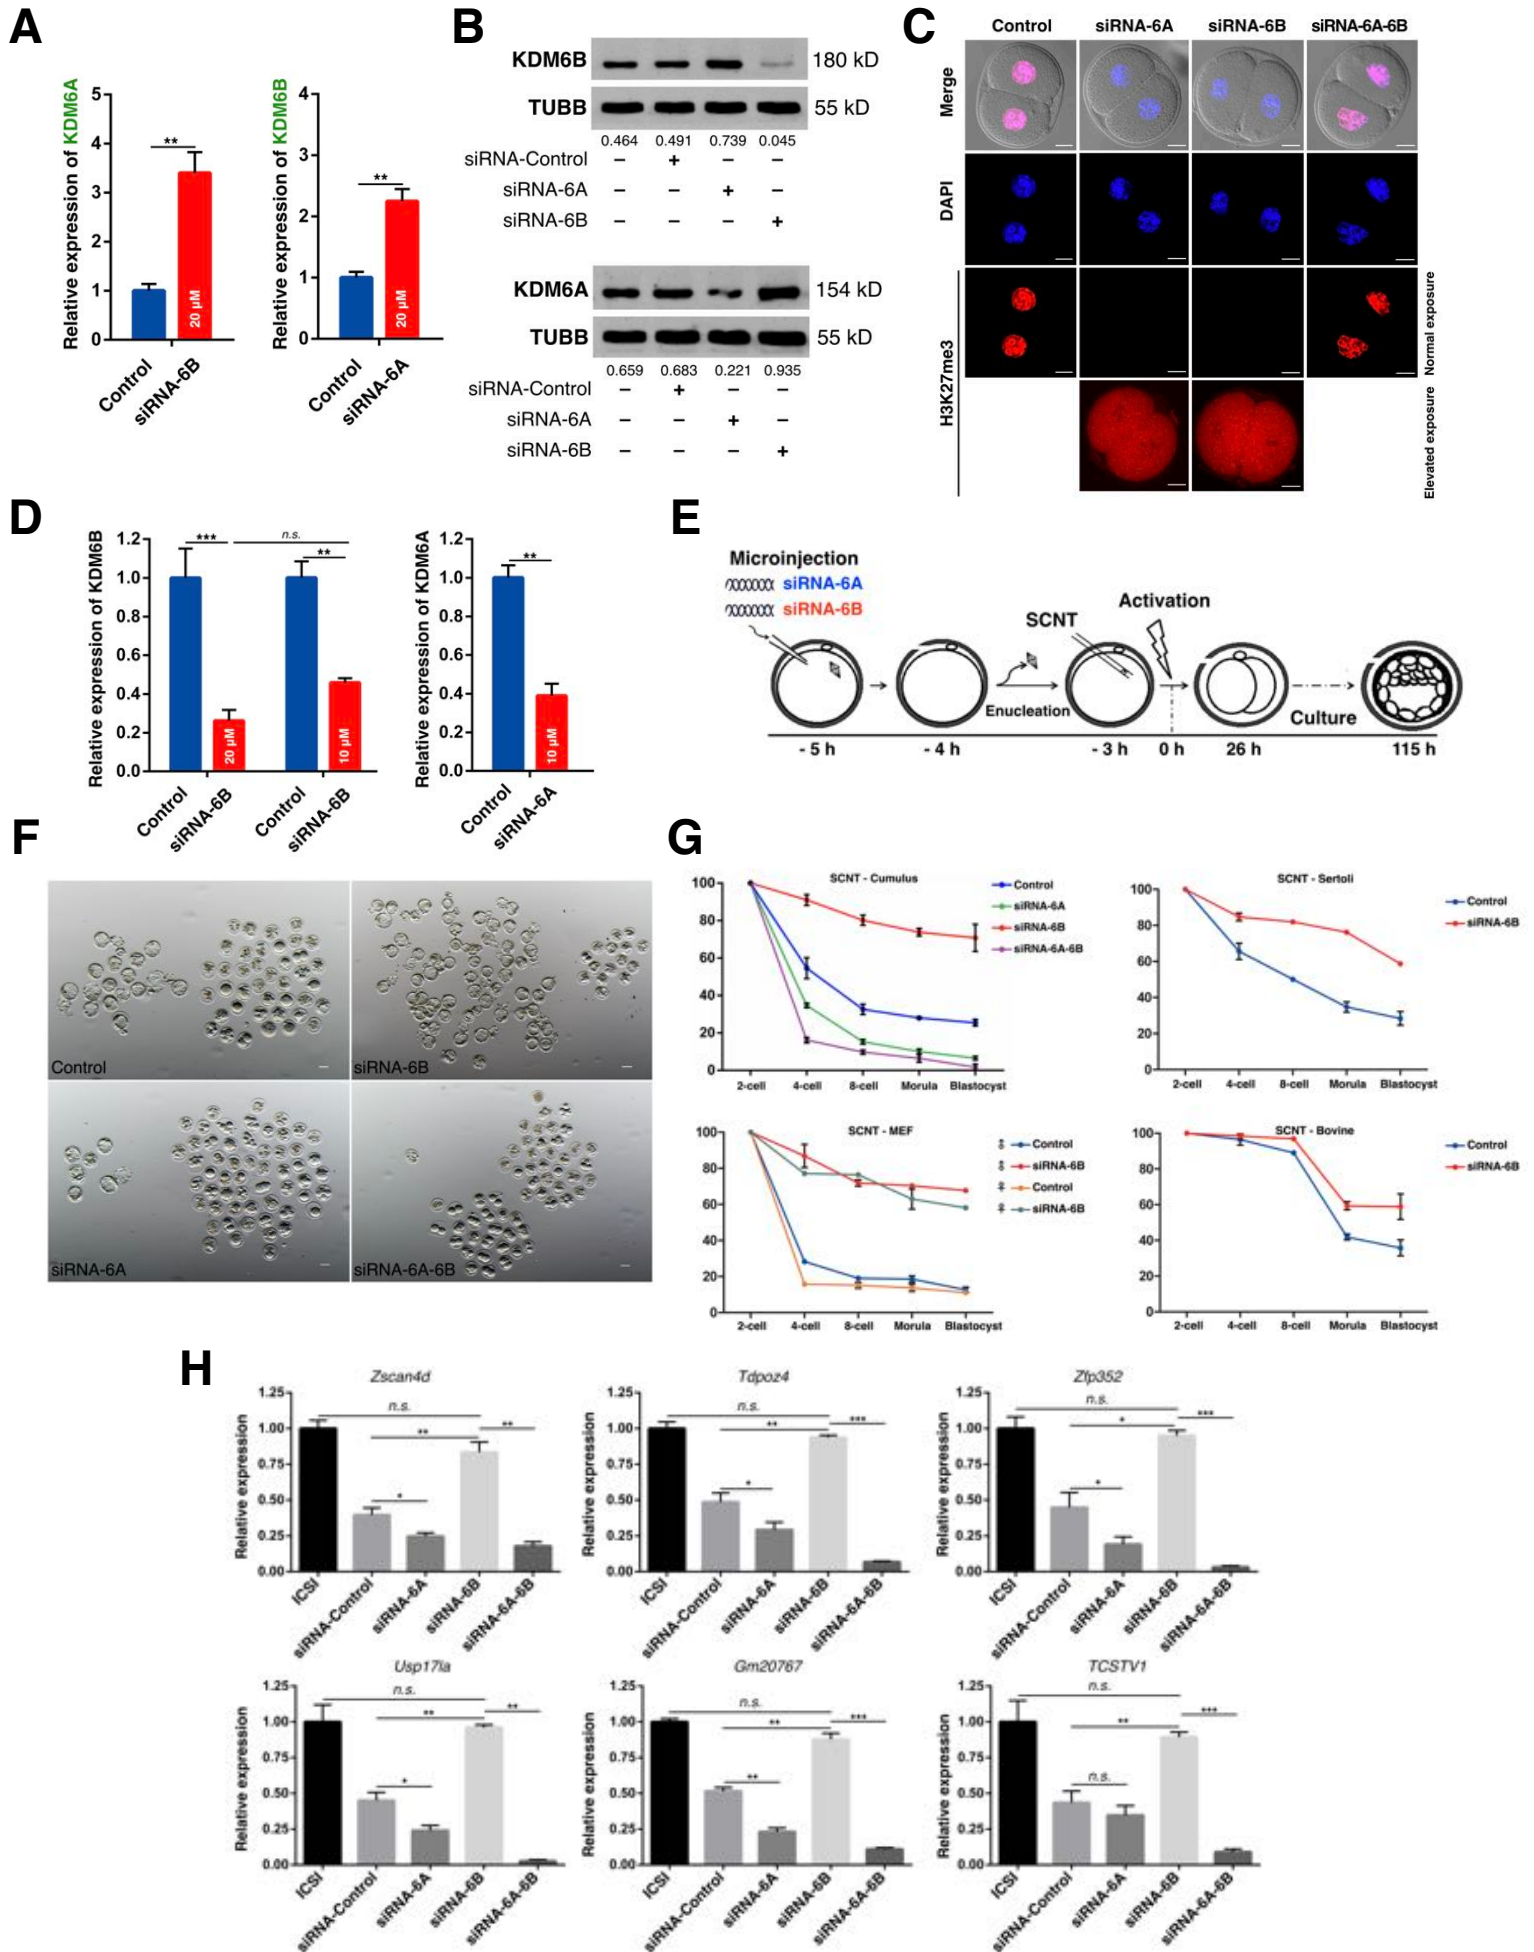

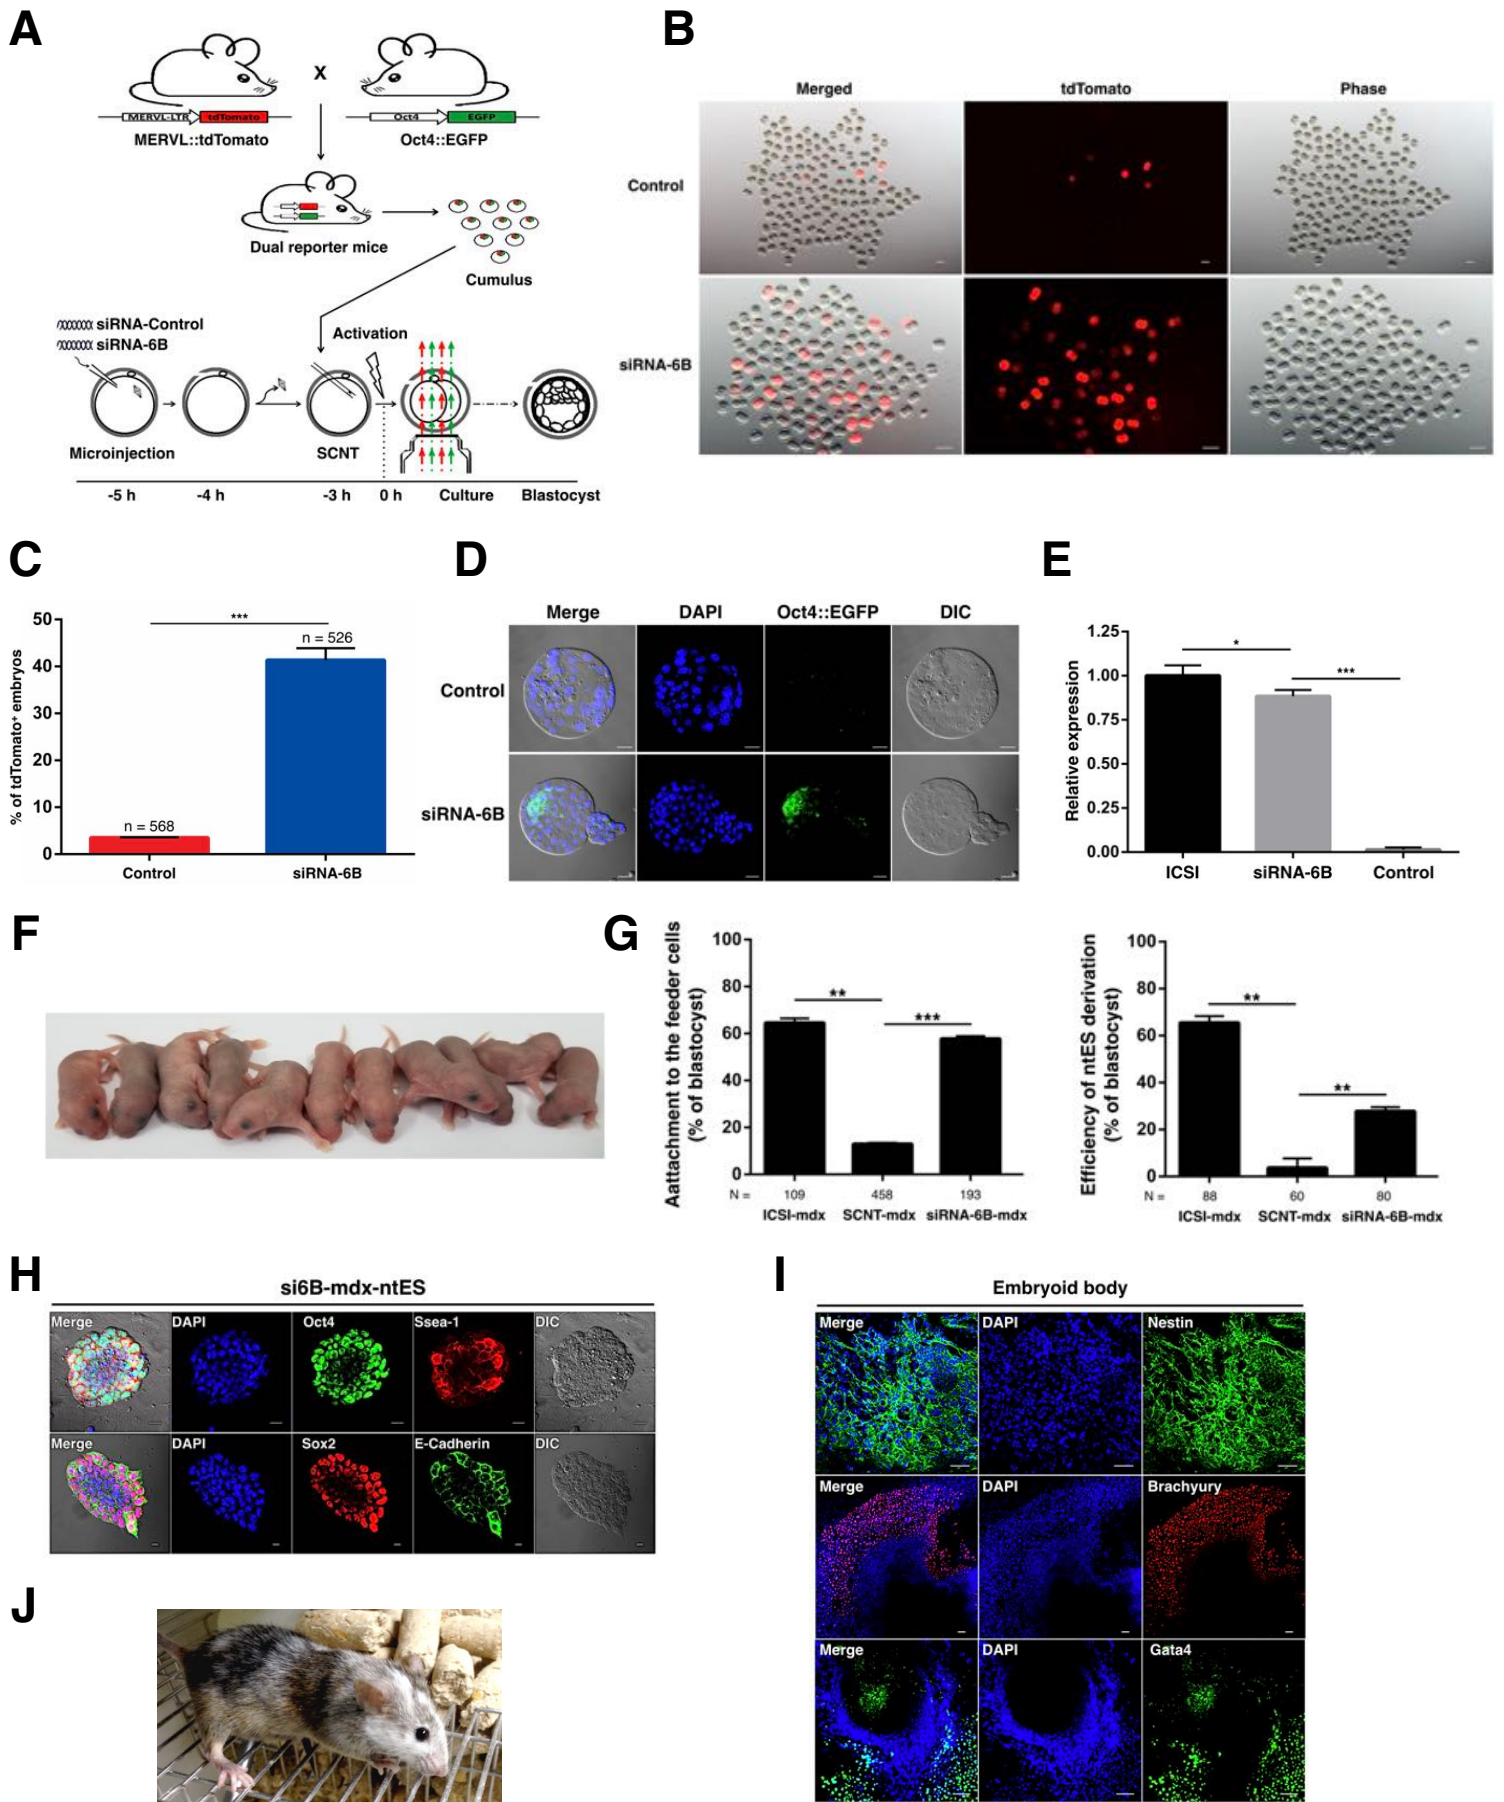



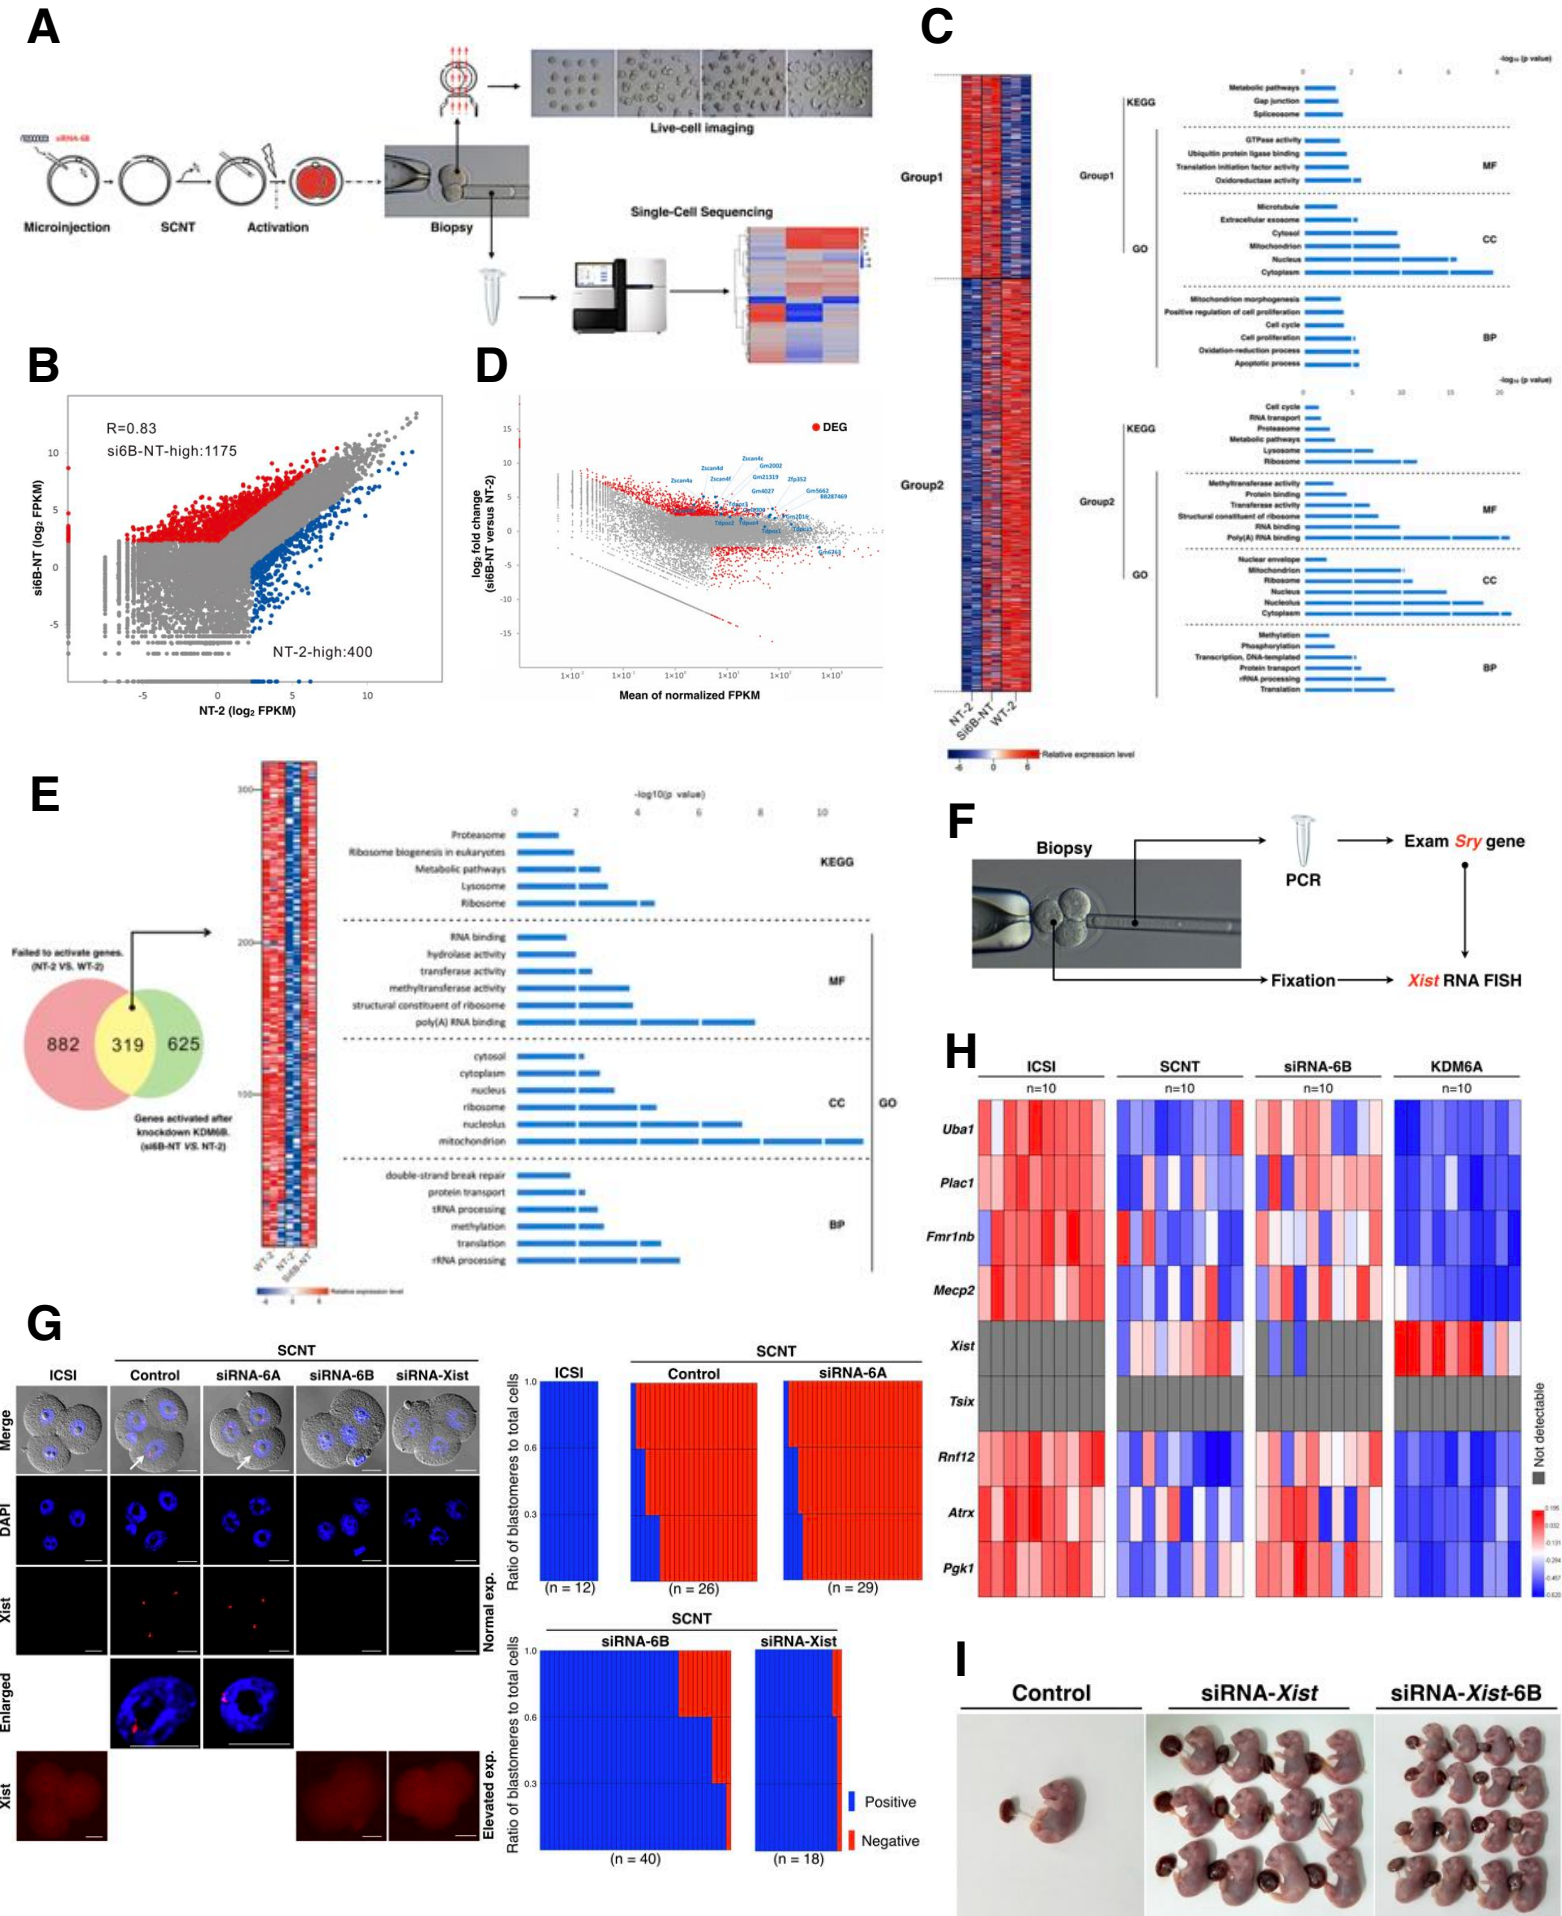

Source: http://biorxiv.org/content/10.1101/390484v1.full.pdf
